# Supplementary material for: Occurrence and Definitions of Intra and Postoperative Complications Related to Laparoscopy in Equids: A Scoping Review
Source: MDPI journal article supplement (doi:10.3390/vetsci9100577), 2022-10-17
Supplement: s1 [file s1]

| Article title                                                                                                                                                                                                                                                                                                                          | Type of study                   | Location      | N of cases | Apparatus (GI/UG/both /other) | Purpose (diagnostic/ treatment/ preventive/ex perimental) | Standing/ Recumbency | Pneumoperitoneum | Hand assisted |
|----------------------------------------------------------------------------------------------------------------------------------------------------------------------------------------------------------------------------------------------------------------------------------------------------------------------------------------|---------------------------------|---------------|------------|-------------------------------|-----------------------------------------------------------|----------------------|------------------|---------------|
| 1. Al-Badrany MS. Laparoscopic ovariectomy in standing donkeys by titanium clips and monopolar electrocautery. <i>Journal of Animal and Veterinary Advances</i> . 2007;6(5):663-667.                                                                                                                                                   | Experimental in vivo study      | Asia          | 6          | UG                            | Experimental                                              | Standing             | x                | X             |
| 2. Albanese V, Hanson RR, McMaster MA, Koehler JW, Caldwell FJ. Use of a Barbed Knotless Suture for Laparoscopic Ablation of the Nephrosplenic Space in 8 Horses. <i>Veterinary Surgery</i> . Aug 2016;45(6):824-830. doi:10.1111/vsu.12520                                                                                            | Experimental in vivo study      | North America | 8          | Other                         | Preventive                                                | Standing             |                  | X             |
| 3. Alldredge JG, Hendrickson DA. Use of high-power ultrasonic shears for laparoscopic ovariectomy in mares. Article. <i>Journal of the American Veterinary Medical Association</i> . 2004;225(10):1578-1580. doi:10.2460/javma.2004.225.1578                                                                                           | Prospective observational study | North America | 10         | UG                            | Treatment                                                 | Standing             | x                |               |
| 4. Alsafy MAM, El-Kammar MH, Kassem MM, El-Gendy SAA, El-Khamary AN. Laparoscopic Anatomy of the Abdomen and Laparoscopic Ligating Loops, Electrocoagulation, and a Novel Modified Electroligation Ovariectomy in Standing Mare. <i>Journal of Equine Veterinary Science</i> . Nov 2013;33(11):912-923. doi:10.1016/j.jevs.2013.01.007 | Experimental in vivo study      | Asia          | 9          | UG                            | Experimental                                              | Standing             | x                |               |
| 5. Arévalo Rodríguez JM, Grulke S, Salciccia A, De La Rebière De Pouyade G. Nephrosplenic space closure significantly decreases recurrent colic in horses: A retrospective analysis. Note. <i>Veterinary Record</i> . 2019;185(21):657. doi:10.1136/vr.105458                                                                          | Retrospective case-control      | Europe        | 42         | Other                         | Preventive                                                | Standing             |                  |               |
| 6. Aziz DM, Al-Badrany MS, Taha MB. Laparoscopic ovariectomy in standing donkeys by using a new instrument. <i>Animal Reproduction Science</i> . Aug 2008;107(1-2):107-114. doi:10.1016/j.anireprosci.2007.06.011                                                                                                                      | Experimental in vivo study      | Asia          | 6          | UG                            | Experimental                                              | Standing             | x                |               |
| 7. Barrell EA, Kamm JL, Hendrickson DA. Recurrence of renosplenic entrapment after renosplenic space ablation in a seven-year-old stallion. <i>Journal of the American Veterinary Medical Association</i> . 2011;239(4):504-507. doi:10.2460/javma.239.4.504                                                                           | Case report                     | North America | 1          | GI                            | Treatment                                                 | Standing             | x                |               |
| 8. Bartmann CP, Lorber KJ. Laparoscopic gonadectomy in two half-sister horses with male pseudohermaphroditism of the testicular feminisation type. <i>Equine Veterinary Education</i> . 2003;15(6):299-304. doi:10.1111/j.2042-3292.2003.tb00253.x                                                                                     | Case report                     | Europe        | 2          | UG                            | Treatment                                                 | Standing             | x                | X             |

|                                                                                                                                                                                                                                                                  |                                 |               |    |       |              |            |   |   |
|------------------------------------------------------------------------------------------------------------------------------------------------------------------------------------------------------------------------------------------------------------------|---------------------------------|---------------|----|-------|--------------|------------|---|---|
| 9. Bleyaert HF, Brown MP, Bonenclark G, Bailey JE. Laparoscopic adhesiolysis in a horse. <i>Veterinary Surgery</i> . Nov-Dec 1997;26(6):492-496. doi:10.1111/j.1532-950X.1997.tb00522.x                                                                          | Case report                     | North America | 1  | GI    | Treatment    | Recumbency | x | X |
| 10. Bont MPd, Wilderjans H, Simon O. Standing laparoscopic ovariectomy technique with intraabdominal dissection for removal of large pathologic ovaries in mares. <i>Veterinary Surgery</i> . 2010;39(6):737-741.                                                | Case series                     | Europe        | 43 | UG    | Treatment    | Standing   | x | X |
| 11. Bouré LP, Pearce SG, Kerr CL, et al. Evaluation of laparoscopic adhesiolysis for the treatment of experimentally induced adhesions in pony foals. Article. <i>American Journal of Veterinary Research</i> . 2002;63(2):289-294. doi:10.2460/ajvr.2002.63.289 | Experimental in vivo study      | North America | 8  | GI    | Experimental | Recumbency | x | X |
| 12. Bouré L, Marcoux M, Laverty S. Laparoscopic abdominal anatomy of foals positioned in dorsal recumbency. Article. <i>Veterinary Surgery</i> . 1997;26(1):1-6. doi:10.1111/j.1532-950X.1997.tb01455.x                                                          | Experimental in vivo study      | North America | 2  | Other | Experimental | Recumbency | x | X |
| 13. Bouré L, Marcoux M, Laverty S. Paralumbar fossa laparoscopic ovariectomy in horses with use of Endoloop ligatures. Article. <i>Veterinary Surgery</i> . 1997;26(6):478-483. doi:10.1111/j.1532-950X.1997.tb00520.x                                           | Experimental in vivo study      | North America | 7  | UG    | Treatment    | Both       | x |   |
| 14. Bracamonte JL, Bouré LP, Geor RJ, et al. Evaluation of a laparoscopic technique for collection of serial full-thickness small intestinal biopsy specimens in standing sedated horses. <i>Am J Vet Res</i> . Mar 2008;69(3):431-9. doi:10.2460/ajvr.69.3.431  | Experimental in vivo study      | North America | 13 | GI    | Experimental | Standing   | x | X |
| 15. Bracamonte JL, Duke-Novakovski T. A pilot study evaluating laparoscopic closure of the nephrosplenic space using an endoscopic suturing device in standing horses. <i>Canadian Veterinary Journal-Revue Veterinaire Canadienne</i> . Jun 2016;57(6):651-654. | Prospective observational study | North America | 4  | Other | Experimental | Standing   | x |   |
| 16. Bracamonte JL, Thomas KL. Laparoscopic cryptorchidectomy with a vessel-sealing device in dorsal recumbent horses: 43 cases. Article. <i>Veterinary Surgery</i> . 2017;46(4):559-565. doi:10.1111/vsu.12624                                                   | Retrospective case series       | North America | 43 | UG    | Treatment    | Recumbency | x |   |

|                                                                                                                                                                                                                                         |                            |               |    |       |                      |            |   |   |
|-----------------------------------------------------------------------------------------------------------------------------------------------------------------------------------------------------------------------------------------|----------------------------|---------------|----|-------|----------------------|------------|---|---|
| 17. Brink P, Schumacher J. Elevating the uterus (uteropexy) of five mares by laparoscopically imbricating the mesometrium. <i>Equine Veterinary Journal</i> . Nov 2010;42(8):675-679. doi:10.1111/j.2042-3306.2010.00069.x              | Retrospective case series  | North America | 5  | UG    | Treatment            | Standing   | x | X |
| 18. Brommer H, Grinwis GCM, van Loon V, Ensink JM. Laparoscopic-assisted diagnosis of anomalous unilateral abdominal cryptorchidism. <i>Equine Veterinary Education</i> . Aug 2011;23(8):391-395. doi:10.1111/j.2042-3292.2011.00243.x  | Case report                | Europe        | 1  | UG    | Diagnostic           | Standing   | x |   |
| 19. Brugmans F, Deegen E. Laparoscopic surgical technique for repair of rectal and colonic tears in horses: An experimental study. Article. <i>Veterinary Surgery</i> . 2001;30(5):409-416. doi:10.1053/jvet.2001.25864                 | Experimental in vivo study | Europe        | 3  | GI    | Experimental         | Recumbency | x |   |
| 20. Burke MJ, Parente EJ. Prosthetic Mesh for Obliteration of the Nephrosplenic Space in Horses: 26 Clinical Cases. Article. <i>Veterinary Surgery</i> . 2016;45(2):201-207. doi:10.1111/vsu.12434                                      | Retrospective case series  | North America | 26 | Other | Preventive           | Standing   | x | X |
| 21. Busschers E, Southwood LL, Parente EJ. Laparoscopic diagnosis and correction of a nephrosplenic entrapment of the large colon in a horse. <i>Equine Veterinary Education</i> . Mar 2007;19(2):60-63. doi:10.2746/095777307x181889   | Case report                | North America | 1  | GI    | Diagnostic/treatment | Standing   | x |   |
| 22. Butt TD, Wilson DG. Laparoscopic colopexy in a horse. <i>Can Vet J</i> . Jul 2003;44(7):586-8.                                                                                                                                      | Case report                | North America | 1  | GI    | Preventive           | Recumbency | x |   |
| 23. Carluccio A, de Amicis I, Petrizzi L, et al. Laparoscopic drainage of an ovarian haematoma in a Martina Franca jenny ( <i>Equus asinus</i> ). Article. <i>Veterinari Medicina</i> . 2020;65(8):358-363. doi:10.17221/29/2020-VETMED | Case report                | Europe        | 1  | UG    | Treatment            | Standing   | x | X |
| 24. Caron JP, Brakenhoff J. Intracorporeal suture closure of the internal inguinal and vaginal rings in foals and horses. Article. <i>Veterinary Surgery</i> . 2008;37(2):126-131. doi:10.1111/j.1532-950X.2007.00366.x                 | Case series                | North America | 8  | UG    | Treatment/preventive | Recumbency | x |   |

|                                                                                                                                                                                                                                                                     |                                 |               |    |       |                      |            |   |   |
|---------------------------------------------------------------------------------------------------------------------------------------------------------------------------------------------------------------------------------------------------------------------|---------------------------------|---------------|----|-------|----------------------|------------|---|---|
| 25. Caron JP, Mehler SJ. Laparoscopic mesh incisional hernioplasty in five horses. Article. <i>Veterinary Surgery</i> . 2009;38(3):318-325. doi:10.1111/j.1532-950X.2009.00511.x                                                                                    | Case series                     | North America | 5  | Other | Treatment            | Recumbency | x |   |
| 26. Cokelaere SM, Martens AMJG, Wiemer P. Laparoscopic ovariectomy in mares using a polyamide tie-rap. Article. <i>Veterinary Surgery</i> . 2005;34(6):651-656. doi:10.1111/j.1532-950X.2005.00101.x                                                                | Prospective observational study | Europe        | 10 | UG    | Experimental         | Standing   | x | X |
| 27. Cokelaere SM, Martens A, Vanschandevijl K, Wilderjans H, Steenhaut M. Hand-assisted laparoscopic nephrectomy after initial ureterocystostomy in a Shire filly with left ureteral ectopia. <i>Vet Rec</i> . Sep 22 2007;161(12):424-7. doi:10.1136/vr.161.12.424 | Case report                     | Europe        | 1  | UG    | Treatment            | Standing   |   |   |
| 28. Colbath AC, Hackett ES, Lesser CS, Hendrickson DA. Left paralumbar laparoscopic bilateral ovariectomy in mares. <i>Veterinary Surgery</i> . May 2017;46(4):574-579. doi:10.1111/vsu.12637                                                                       | Prospective observational study | North America | 20 | UG    | Experimental         | Standing   | x |   |
| 29. Collar EM, Duesterdieck-Zellmer KF, Huber MJ, Semevolos SA, Parker JE, Husby KA. Outcome of bilateral equid laparoscopic ovariectomies. Article. <i>Veterinary Surgery</i> . 2021;50(5):975-983. doi:10.1111/vsu.13651                                          | Retrospective cohort study      | North America | 51 | UG    | Treatment/preventive | Standing   | x | X |
| 30. Comino F, Röcken M, Gorvy D. Standing laparoscopy combined with a conventional inguinal approach to treat extended septic funiculitis in 12 horses. <i>Vet Surg</i> . Apr 18 2022;doi:10.1111/vsu.13809                                                         | Retrospective case series       | Multicentric  | 12 | UG    | Treatment            | Standing   | x |   |
| 31. Corsalini J, Gialletti R, Lotto E, Nannarone S. Laparoscopic Uteropexy (Mesometrium Imbrication) in Three Mares Using a Barbed Suture. <i>Journal of Equine Veterinary Science</i> . May 2016;40:102-105. doi:10.1016/j.jevs.2016.02.236                        | Prospective observational study | Europe        | 3  | UG    | Treatment            | Standing   | x |   |
| 32. Cribb NC, Arroyo LG, Boure L. Standing laparoscopic abdominal lavage using a suction-irrigation device in 2 horses with primary suppurative peritonitis. <i>Canadian Veterinary Journal-Revue Veterinaire Canadienne</i> . Apr 2021;62(4):397-402.              | Case report                     | North America | 2  | Other | Treatment            | Standing   |   |   |

|                                                                                                                                                                                                                                                                                                                                                         |                            |               |    |       |           |          |   |   |
|---------------------------------------------------------------------------------------------------------------------------------------------------------------------------------------------------------------------------------------------------------------------------------------------------------------------------------------------------------|----------------------------|---------------|----|-------|-----------|----------|---|---|
| 33. Cribb NC, Boure LP. Laparoscopic Removal of a Large Abdominal Testicular Teratoma in a Standing Horse. <i>Veterinary Surgery</i> . Jan 2010;39(1):131-135. doi:10.1111/j.1532-950X.2009.00618.x                                                                                                                                                     | Case report                | North America | 1  | UG    | Treatment | Standing | x |   |
| 34. Cribb NC, Koenig J, Sorge U. Comparison of laparoscopic versus conventional open cryptorchidectomies on intraoperative and postoperative complications and duration of surgery, anesthesia, and hospital stay in horses. <i>Javma-Journal of the American Veterinary Medical Association</i> . Apr 2015;246(8):885-892. doi:10.2460/javma.246.8.885 | Retrospective cohort study | North America | 46 | UG    | Treatment | Standing |   |   |
| 35. Cypher EE, Blackford J, Snowden RT, Sexton JA, Schumacher J. Surgical correction of entrapment of the large colon and caecum through a mesoduodenal rent with standing laparoscopic repair in a mare. <i>Equine Veterinary Education</i> . Apr 2020;32(4):185-188. doi:10.1111/eve.12941                                                            | Case report                | North America | 1  | GI    | Treatment | Standing | x | X |
| 36. Daniel AJ, Easley JT, Story MR, Hendrickson DA, Hackett ES. Standing hand-assisted laparoscopic removal of large granulosa cell tumours in horses using a specimen retrieval bag and morcellator. <i>Equine Veterinary Education</i> . Oct 2015;27(10):505-509. doi:10.1111/eve.12374                                                               | Case report                | North America | 3  | UG    | Treatment | Standing | x |   |
| 37. Daniel A, McCue P, Ferris R, Miller C, Leise B. Bilateral ovarian leiomyoma treated by standing laparoscopic ovariectomy. <i>Equine Veterinary Education</i> . Oct 2015;27(10):510-514. doi:10.1111/eve.12438                                                                                                                                       | Case report                | North America | 1  | UG    | Treatment | Standing | x |   |
| 38. Davis EW. Laparoscopic cryptorchidectomy in standing horses. <i>Veterinary Surgery</i> . Jul-Aug 1997;26(4):326-331. doi:10.1111/j.1532-950X.1997.tb01505.x                                                                                                                                                                                         | Prospective clinical study | North America | 11 | UG    | Treatment | Standing | x |   |
| 39. de Fourmestreaux C, Geffroy O, Siliart B, Albaric O, Tessier C. Evaluation of success rate of laparoscopic castration without orchidectomy in 32 mature horses. <i>Equine Veterinary Education</i> . Jan 2014;26(1):34-39. doi:10.1111/eve.12089                                                                                                    | Retrospective case series  | Europe        | 32 | UG    | Treatment | Standing |   |   |
| 40. Delcazo M, Geburek F, Kohler K, Rocken M, Theiss F. Laparoscopic resection of an exostosis of the os pubis in a horse. <i>Veterinary Surgery</i> . Apr 2020;49(3):614-620. doi:10.1111/vsu.13349                                                                                                                                                    | Case report                | Europe        | 1  | Other | Treatment | Standing | x |   |

|                                                                                                                                                                                                                                                                                           |                                 |               |    |       |                      |            |   |   |
|-------------------------------------------------------------------------------------------------------------------------------------------------------------------------------------------------------------------------------------------------------------------------------------------|---------------------------------|---------------|----|-------|----------------------|------------|---|---|
| 41. Delli-Rocili MM, Cribb NC, Trout DR, Thomason JJ, Valverde A. Effectiveness of a paravertebral nerve block versus local portal blocks for laparoscopic closure of the nephrosplenic space: A pilot study. <i>Veterinary Surgery</i> . Jul 2020;49(5):1007-1014. doi:10.1111/vsu.13452 | Randomized clinical trial       | North America | 12 | Other | Experimental         | Standing   |   |   |
| 42. Delling U, Howard RD, Pleasant RS, Lanz OI. Hand-assisted laparoscopic ovariohysterectomy in the mare. <i>Vet Surg</i> . Sep-Oct 2004;33(5):487-94. doi:10.1111/j.1532-950x.2004.04063.x                                                                                              | Experimental in vivo study      | North America | 8  | UG    | Experimental         | Recumbency | x |   |
| 43. Delling U, Stoebe S, Brehm W. Hand-assisted laparoscopic adhesiolysis of extensive small intestinal adhesions in a mare after breeding injury. <i>Equine Veterinary Education</i> . Nov 2012;24(11):545-551. doi:10.1111/j.2042-3292.2011.00333.x                                     | Case report                     | Europe        | 1  | GI    | Treatment            | Standing   | x |   |
| 44. Desmaizières LM, Martinot S, Lepage OM, Bareiss E, Cadoré JL. Complications associated with cannula insertion techniques used for laparoscopy in standing horses. Article. <i>Veterinary Surgery</i> . 2003;32(6):501-506. doi:10.1111/j.1532-950X.2003.00501.x                       | Retrospective cohort study      | Europe        | 40 | Other | Diagnostic/treatment | Standing   | x |   |
| 45. Devick IF, Hendrickson DA. Left paralumbar fossa approach combined with mesocolon fenestration for bilateral equine ovariectomy. <i>Vet Surg</i> . Jul 2019;48(5):735-741. doi:10.1111/vsu.13166                                                                                      | Experimental in vivo study      | North America | 5  | UG    | Experimental         | Standing   | x |   |
| 46. Devick IF, Leise BS, Rao S, Hendrickson DA. Evaluation of post-operative pain after active desufflation at completion of laparoscopy in mares undergoing ovariectomy. <i>Canadian Veterinary Journal-Revue Veterinaire Canadienne</i> . Mar 2018;59(3):261-266.                       | Prospective observational study | North America | 38 | UG    | Treatment            | Standing   | x | X |
| 47. Diekstaal M, Rijkenhuizen A. Mesorectal hematoma associated with colic and caudal neurological signs in a horse. <i>Pferdeheilkunde</i> . May-Jun 2018;34(3):232-236. doi:10.21836/pem20180303                                                                                        | Case report                     | Europe        | 1  | Other | Diagnostic           | Standing   | x |   |
| 48. Diekstaal M, Rohde C, Rijkenhuizen ABM. Post-partum uterine rupture: Standing repair in three mares using a laparoscopic technique. <i>Equine Veterinary Education</i> . Jun 2020;32(6):319-324. doi:10.1111/eve.13001                                                                | Prospective observational study | Europe        | 3  | UG    | Treatment            | Standing   | x |   |

|                                                                                                                                                                                                                                                          |                                 |               |    |       |              |            |   |   |
|----------------------------------------------------------------------------------------------------------------------------------------------------------------------------------------------------------------------------------------------------------|---------------------------------|---------------|----|-------|--------------|------------|---|---|
| 49. Düsterdieck KF, Pleasant RS, Lanz OI, Saunders G, Howard RD. Evaluation of the harmonic scalpel for laparoscopic bilateral ovariectomy in standing horses. <i>Vet Surg.</i> May-Jun 2003;32(3):242-50. doi:10.1053/jvet.2003.50022                   | Experimental in vivo study      | North America | 8  | UG    | Experimental | Standing   | x | X |
| 50. Easley JT, McGilvray KC, Hendrickson DA, Bruemmer J, Hackett ES. Vessel sealer and divider instrument temperature during laparoscopic ovariectomy in horses. Article. <i>Veterinary Surgery.</i> 2018;47:O26-O31. doi:10.1111/vsu.12755              | Prospective observational study | North America | 15 | UG    | Experimental | Standing   | x | X |
| 51. El-Sherif MW, El-Khamary AN, Abdel-Wahed RE. Lateral versus dorsal recumbent laparoscopic cryptorchidectomy and castration in horses. <i>Online Journal of Veterinary Research.</i> 2017;21(8):523-530.                                              | Prospective case-control        | Asia          | 20 | UG    | Treatment    | Recumbency |   |   |
| 52. Epstein KL, Parente EJ. Laparoscopic obliteration of the nephrosplenic space using polypropylene mesh in five horses. <i>Veterinary Surgery.</i> Jul 2006;35(5):431-437. doi:10.1111/j.1532-950X.2006.00171.x                                        | Experimental in vivo study      | North America | 5  | Other | Experimental | Standing   |   |   |
| 53. Farstvedt E, Hendrickson D. Laparoscopic closure of the nephrosplenic space for prevention of recurrent nephrosplenic entrapment of the ascending colon. <i>Veterinary Surgery.</i> Nov-Dec 2005;34(6):642-645. doi:10.1111/j.1532-950X.2005.00099.x | Retrospective case series       | North America | 10 | Other | Preventive   | Standing   | x |   |
| 54. Fernández-Parra R, Losada-Floriano A, Zilberstein L, Bourzac C. Iatrogenic pneumothorax-induced heart murmur during standing laparoscopy in a 3-year-old horse. Article. <i>Equine Veterinary Education.</i> 2022;doi:10.1111/eve.13641              | Case report                     | Europe        | 1  | Other | Preventive   | Standing   | x |   |
| 55. Finley CJ, Fischer AT. Removal of equine cryptorchid testes through an enlarged umbilical portal in dorsally recumbent horses after intra-abdominal laparoscopic castration. <i>Equine Veterinary Journal.</i> doi:10.1111/evj.13483                 | Retrospective case series       | North America | 79 | UG    | Treatment    | Recumbency | x |   |
| 56. Gablehouse KB, Cary J, Farnsworth K, Ragle CA. Standing laparoscopic-assisted vaginal ovariohysterectomy in a mare. <i>Equine Veterinary Education.</i> Jun 2009;21(6):303-306. doi:10.2746/095777309x446603                                         | Case report                     | North America | 1  | UG    | Treatment    | Standing   | x |   |

|                                                                                                                                                                                                                                                       |                            |               |    |       |            |            |   |   |
|-------------------------------------------------------------------------------------------------------------------------------------------------------------------------------------------------------------------------------------------------------|----------------------------|---------------|----|-------|------------|------------|---|---|
| 57. Gandini M, Giusto G, Caramello V, Comino F, Rosso A. Single-port laparoscopic incisional hernia repair in a horse. <i>Equine Veterinary Education</i> . Jul 2017;29(7):362-366. doi:10.1111/eve.12547                                             | Case report                | Europe        | 1  | Other | Treatment  | Recumbency | x |   |
| 58. Gandini M, Labate F, Rosso A, Giusto G. Strangulating obstruction of the small intestine by a fibrous band originating on the nephrosplenic ligament. <i>Equine Veterinary Education</i> . May 2021;33(5):E146-E148. doi:10.1111/eve.13206        | Case report                | Europe        | 1  | GI    | Treatment  | Standing   | x |   |
| 59. Gandini M, Nannarone S, Giusto G, et al. Laparoscopic nephrosplenic space ablation with barbed suture in eight horses. <i>Javma-Journal of the American Veterinary Medical Association</i> . Feb 2017;250(4):431-436. doi:10.2460/javma.250.4.431 | Case series                | Europe        | 8  | Other | Preventive | Standing   |   | X |
| 60. Gardner AK, Santschi EM, Aeffner F, Pigott JH, Russell DS. Testicular ischaemic necrosis as a cause of equine cryptorchidism. Article. <i>Equine Veterinary Education</i> . 2017;29(6):314-317. doi:10.1111/eve.12544                             | Case report                | North America | 1  | UG    | Treatment  | Recumbency | x | X |
| 61. Gialletti R, Nannarone S, Gandini M, et al. Comparison of Mesh and Barbed Suture for Laparoscopic Nephrosplenic Space Ablation in Horses. <i>Animals</i> . Apr 2021;11(4)1096. doi:10.3390/ani11041096                                            | Retrospective case-control | Europe        | 28 | Other | Preventive | Standing   | x |   |
| 62. Goodin JT, Rodgerson DH, Gomez JH. Standing Hand-Assisted Laparoscopic Ovariectomy in 65 Mares. Article. <i>Veterinary Surgery</i> . 2011;40(1):90-92. doi:10.1111/j.1532-950X.2010.00771.x                                                       | Case series                | North America | 65 | UG    | Treatment  | Standing   |   |   |
| 63. Goto A, Tagami M, Kato F, et al. Equine nonneoplastic abnormal ovary in a draft mare with high serum anti-Müllerian hormone: a case study. <i>Journal of Equine Science</i> . 2021;32(4):147-151. doi:10.1294/jes.32.147                          | Case report                | Asia          | 1  | UG    | Treatment  | Standing   | x |   |
| 64. Gottschalk RD, Berg SSvd. Standing laparoscopically-aided ovariectomy in mares. <i>Journal of the South African Veterinary Association</i> . 1997;68(3):102-104.                                                                                  | Case series                | Africa        | 13 | UG    | Treatment  | Standing   |   |   |

|                                                                                                                                                                                                                                                                                                                  |                              |               |    |       |                      |          |   |  |
|------------------------------------------------------------------------------------------------------------------------------------------------------------------------------------------------------------------------------------------------------------------------------------------------------------------|------------------------------|---------------|----|-------|----------------------|----------|---|--|
| 65. Gracia-Calvo LA, Duque J, Balao da Silva C, Ezquerro J, Ortega-Ferrusola C. Testicular perfusion after standing laparoscopic peritoneal flap hernioplasty in stallions. Article. <i>Theriogenology</i> . 2015;84(5):797-804. doi:10.1016/j.theriogenology.2015.05.014                                        | Case series                  | Europe        | 6  | UG    | Treatment            | Standing |   |  |
| 66. Gracia-Calvo LA, Ezquerro LJ, Martín-Cuervo M, et al. Standing laparoscopic peritoneal flap hernioplasty of the vaginal rings does not modify the sperm production and motility characteristics in intact male horses. <i>Reproduction in Domestic Animals</i> . 2014;49(6):1043-1048. doi:10.1111/rda.12434 | Case series                  | Europe        | 6  | UG    | Preventive           | Standing |   |  |
| 67. Gracia-Calvo LA, Ezquerro LJ, Ortega-Ferrusola C, et al. Histological findings in equine testes one year after standing laparoscopic peritoneal flap hernioplasty. Article. <i>Veterinary Record</i> . 2016;178(18):450. doi:10.1136/vr.103236                                                               | Case series                  | Europe        | 10 | Other | Preventive           | Standing |   |  |
| 68. Gracia-Calvo L, Martín-Cuervo M, Jiménez J, et al. Development of a technique for standing hand-assisted laparoscopic splenectomy in five horses. Article. <i>Australian Veterinary Journal</i> . 2015;93(6):183-188. doi:10.1111/avj.12326                                                                  | Case series                  | Europe        | 5  | Other | Experimental         | Standing | x |  |
| 69. Hand R, Rakestraw P, Taylor T. Evaluation of a vessel-sealing device for use in laparoscopic ovariectomy in mares. <i>Vet Surg</i> . May-Jun 2002;31(3):240-4. doi:10.1053/jvet.2002.33482                                                                                                                   | Prospective clinical study   | North America | 13 | UG    | Preventive           | Standing | x |  |
| 70. Hanrath M, Rodgerson DH. Laparoscopic cryptorchidectomy using electrosurgical instrumentation in standing horses. Article. <i>Veterinary Surgery</i> . 2002;31(2):117-124. doi:10.1053/jvet.31049                                                                                                            | Retrospective clinical study | North America | 10 | UG    | Treatment            | Standing | x |  |
| 71. Hanson CA, Galuppo LD. Bilateral laparoscopic ovariectomy in standing mares: 22 Cases. Article. <i>Veterinary Surgery</i> . 1999;28(2):106-112. doi:10.1053/jvet.1999.0106                                                                                                                                   | Prospective clinical study   | North America | 22 | UG    | Treatment            | Standing | x |  |
| 72. Hendrickson DA, Wilson DG. Laparoscopic cryptorchid castration in standing horses. <i>Veterinary Surgery</i> . Jul-Aug 1997;26(4):335-339. doi:10.1111/j.1532-950X.1997.tb01507.x                                                                                                                            | Prospective clinical study   | North America | 8  | UG    | Diagnostic/Treatment | Standing | x |  |

|                                                                                                                                                                                                                                                                                      |                           |               |    |       |              |          |   |   |
|--------------------------------------------------------------------------------------------------------------------------------------------------------------------------------------------------------------------------------------------------------------------------------------|---------------------------|---------------|----|-------|--------------|----------|---|---|
| 73. Hilton HG, Aleman M, Maher O, Peterson TS, Whitcomb MB, Galuppo LD. Hand-assisted laparoscopic nephrectomy in a standing horse for the management of renal cell carcinoma. <i>Equine Veterinary Education</i> . May 2008;20(5):239-244. doi:10.2746/095777308x295783             | Case report               | North America | 1  | Other | Treatment    | Standing | x | X |
| 74. Holmes JM, Nath LC, Muurlink MA. Laparoscopic cauterisation of the testicular arteries to manage haemoperitoneum in a gelding. <i>Equine Veterinary Education</i> . Jun 2013;25(6):297-300. doi:10.1111/j.2042-3292.2012.00416.x                                                 | Case report               | Australia     | 1  | UG    | Treatment    | Standing |   | X |
| 75. Hoogmoed LMv, Galuppo LD. Laparoscopic ovariectomy using the Endo-GIA stapling device and Endo-Catch pouches and evaluation of analgesic efficacy of epidural morphine sulfate in 10 mares. <i>Veterinary Surgery</i> . 2005;34(6):646-650. doi:10.1111/j.1532-950X.2005.00100.x | Randomized clinical trial | North America | 10 | UG    | Experimental | Standing | x | X |
| 76. Hubert JD, Burba DJ, Moore RM. Evaluation of a vessel-sealing device for laparoscopic granulosa cell tumor removal in standing mares. <i>Vet Surg</i> . Jun 2006;35(4):324-9. doi:10.1111/j.1532-950X.2006.00151.x                                                               | Retrospective case series | North America | 8  | UG    | Treatment    | Standing | x | X |
| 77. Jones ARE, Ragle CA, Anderson D, Scott C. Laparoscopic evaluation of the small intestine in the standing horse: Technique and effects*. Article. <i>Veterinary Surgery</i> . 2017;46(6):812-820. doi:10.1111/vsu.12664                                                           | Prospective pilot study   | North America | 5  | GI    | Experimental | Standing | x | X |
| 78. Jones ARE, Ragle CA, Huggons NA, Tibary AA. Bilateral ovariectomy as a treatment for chronic pyometra in four horses. <i>Equine Veterinary Education</i> . Oct 2020;32(10):E189-E193. doi:10.1111/eve.13167                                                                      | Case series               | North America | 4  | UG    | Treatment    | Standing |   |   |
| 79. Kadic DTN, Bonilla AG. A two-step ovariohysterectomy with unilateral left flank laparoscopic assistance in a Quarter Horse mare. <i>Equine Veterinary Education</i> . Oct 2020;32(10):E199-E202. doi:10.1111/eve.13131                                                           | Case report               | North America | 1  | UG    | Treatment    | Standing | x |   |
| 80. Kambayashi Y, Tsuzuki N, Seo J, et al. Evaluation of single-incision laparoscopic ovariectomy in standing mares. <i>Journal of Equine Veterinary Science</i> . 2014;34(3):446-450. doi:10.1016/j.jevs.2013.07.006                                                                | Case series               | Asia          | 5  | UG    | Treatment    | Standing | x |   |

|                                                                                                                                                                                                                                                                                   |                            |               |    |       |              |            |   |   |
|-----------------------------------------------------------------------------------------------------------------------------------------------------------------------------------------------------------------------------------------------------------------------------------|----------------------------|---------------|----|-------|--------------|------------|---|---|
| 81. Kamus L.P. Ruzickova,P. Piat,P. Trencart,A. BonillaUse of barbed suture for thoracoscopic repair of diaphragmatic hernias: Three cases. <i>Equine Vet edu.</i> 2022                                                                                                           | Case series                | Europe        | 4  | Other | Treatment    | Standing   |   | X |
| 82. Keoughan CG, Rodgerson DH, Brown MP. Hand-assisted laparoscopic left nephrectomy in standing horses. <i>Vet Surg.</i> May-Jun 2003;32(3):206-12. doi:10.1053/jvet.2003.50028                                                                                                  | Prospective clinical study | North America | 8  | UG    | Treatment    | Standing   |   |   |
| 83. Klohnen A, Wilson DG. Laparoscopic repair of scrotal hernia in two foals. <i>Vet Surg.</i> Sep-Oct 1996;25(5):414-16. doi:10.1111/j.1532-950x.1996.tb01437.x                                                                                                                  | Case report                | North America | 2  | GI    | Treatment    | Recumbency | x |   |
| 84. Koch DW, Easley JT, Hatzel JN, et al. Prospective randomized investigation of topical anesthesia during unilateral laparoscopic ovariectomy in horses. <i>Vet Surg.</i> Jun 2020;49 Suppl 1:O54-o59. doi:10.1111/vsu.13264                                                    | Randomized clinical trial  | North America | 15 | UG    | Experimental | Standing   | x |   |
| 85. Köllmann M, Rötting A, Heberling A, Sieme H. Laparoscopic techniques for investigating the equine oviduct. <i>Equine Vet J.</i> Jan 2011;43(1):106-11. doi:10.1111/j.2042-3306.2010.00143.x                                                                                   | Prospective clinical study | Europe        | 10 | UG    | Experimental | Standing   | x |   |
| 86. Kummer M, Theiss F, Jackson M, Fürst A. Evaluation of a Motorized Morcellator for Laparoscopic Removal of Granulosa-Theca Cell Tumors in Standing Mares. Article. <i>Veterinary Surgery.</i> 2010;39(5):649-653. doi:10.1111/j.1532-950X.2010.00688.x                         | Case series                | Europe        | 7  | UG    | Treatment    | Standing   | x |   |
| 87. Lacitignola L, Imperante A, De Siena R, et al. Wound Retractor Laparoscopic Port System for Standing Laparoscopic Cryptorchidectomy in the Horse: A Case Report. <i>Journal of Equine Veterinary Science.</i> Sep 2020;92103168. doi:10.1016/j.jevs.2020.103168               | Case report                | Europe        | 1  | UG    | Treatment    | Standing   | x | X |
| 88. Lawless SP, Moorman VJ, Hendrickson DA, Mama KR. Comparison of sedation quality and safety of detomidine and romifidine as a continuous rate infusion for standing elective laparoscopic ovariectomy in mares. <i>Vet Surg.</i> Jul 2021;50(5):990-998. doi:10.1111/vsu.13627 | Prospective clinical study | North America | 18 | UG    | Experimental | Standing   |   |   |

|     |                                                                                                                                                                                                                                                                                                                 |                            |               |    |       |              |            |   |   |
|-----|-----------------------------------------------------------------------------------------------------------------------------------------------------------------------------------------------------------------------------------------------------------------------------------------------------------------|----------------------------|---------------|----|-------|--------------|------------|---|---|
| 89. | Lloyd D, Walmsley JP, Greet TRC, Payne RJ, Newton JR, Phillips TJ. Electrosurgery as the sole means of haemostasis during the laparoscopic removal of pathologically enlarged ovaries in mares: a report of 55 cases. <i>Equine Veterinary Journal</i> . May 2007;39(3):210-214. doi:10.2746/042516407x17116522 | Case series                | Europe        | 55 | UG    | Treatment    | Standing   |   |   |
| 90. | Lund CM, Ragle CA, Dylan Lutter J, Farnsworth KD. Use of a motorized morcellator for elective bilateral laparoscopic ovariectomy in standing equids: 30 cases (2007-2013). Article. <i>Journal of the American Veterinary Medical Association</i> . 2014;244(10):1191-1197. doi:10.2460/javma.244.10.1191       | Retrospective case series  | North America | 30 | UG    | Treatment    | Standing   |   |   |
| 91. | Lund CM, Ragle CA, Lutter JD. Laparoscopic removal of a bladder urolith in a standing horse. <i>J Am Vet Med Assoc</i> . Nov 1 2013;243(9):1323-8. doi:10.2460/javma.243.9.1323                                                                                                                                 | Case report                | North America | 1  | UG    | Treatment    | Standing   |   |   |
| 92. | Mariën T. Standing laparoscopic herniorrhaphy in stallions using cylindrical polypropylene mesh prosthesis. <i>Equine Vet J</i> . Jan 2001;33(1):91-6. doi:10.2746/042516401776767476                                                                                                                           | Case series                | Europe        | 9  | GI    | Treatment    | Standing   | x |   |
| 93. | Mariën T, Adriaenssen A, Hoeck FV, Segers L. Laparoscopic closure of the renosplenic space in standing horses. Article. <i>Veterinary Surgery</i> . 2001;30(6):559-563. doi:10.1053/jvet.2001.28436                                                                                                             | Prospective clinical study | Europe        | 5  | Other | Experimental | Standing   | x |   |
| 94. | Martin-Flores M, Campoy L, Kinsley MA, Mohammed HO, Gleed RD, Cheetham J. Analgesic and gastrointestinal effects of epidural morphine in horses after laparoscopic cryptorchidectomy under general anesthesia. Article. <i>Veterinary Anaesthesia and Analgesia</i> . 2014;41(4):430-437. doi:10.1111/vaa.12133 | Randomized clinical trial  | North America | 18 | UG    | Treatment    | Recumbency |   |   |
| 95. | McNally TP, Rodgers DH, Lu KG. Infertility in a mare with a chronic uterine tear, diagnosis and successful standing hand-assisted laparoscopic repair. <i>Equine Veterinary Education</i> . Sep 2012;24(9):439-443. doi:10.1111/j.2042-3292.2011.00308.x                                                        | Case report                | North America | 1  | UG    | Treatment    | Standing   |   |   |
| 96. | Mehl ML, Ragle CA. Retroflexion of the large colon in a stallion. <i>Equine Veterinary Education</i> . 2001;13(3):116-118. doi:10.1111/j.2042-3292.2001.tb00073.x                                                                                                                                               | Case report                | North America | 1  | GI    | Treatment    | Standing   | x | X |

|                                                                                                                                                                                                                                                                                                    |                                 |               |    |       |              |            |   |   |
|----------------------------------------------------------------------------------------------------------------------------------------------------------------------------------------------------------------------------------------------------------------------------------------------------|---------------------------------|---------------|----|-------|--------------|------------|---|---|
| 97. Merchan A, Barrett EJ, Rodgeron DH. Hand-assisted laparoscopic cystotomy for cystic calculus removal in male horses (3 cases). <i>Canadian Veterinary Journal-Revue Veterinaire Canadienne</i> . Jan 2021;62(1):22-26.                                                                         | Retrospective case series       | Multicentric  | 3  | UG    | Treatment    | Recumbency | x |   |
| 98. Muñoz J, Bussy C. Standing hand-assisted laparoscopic treatment of left dorsal displacement of the large colon and closure of the nephrosplenic space. Article. <i>Veterinary Surgery</i> . 2013;42(5):595-599. doi:10.1111/j.1532-950X.2012.01050.x                                           | Case series                     | Europe        | 12 | Other | Treatment    | Standing   |   | X |
| 99. Munsterman AS, Hanson RR, Cattley RC, Barrett EJ, Albanese V. Surgical Technique and Short-Term Outcome for Experimental Laparoscopic Closure of the Epiploic Foramen in 6 Horses. <i>Veterinary Surgery</i> . Feb 2014;43(2):105-113. doi:10.1111/j.1532-950X.2013.12116.x                    | Experimental in vivo study      | North America | 6  | GI    | Experimental | Standing   | x | X |
| 100. Muurlink T, Walmsley J, Whitton C. Successful laparoscopic surgery for a uterine leiomyoma in a mare. <i>Equine Veterinary Education</i> . Oct 2008;20(10):508-511. doi:10.2746/095777308x345642                                                                                              | Case report                     | Europe        | 1  | UG    | Treatment    | Standing   | x |   |
| 101. Nelson BB, Ruple-Czerniak AA, Hendrickson DA, Hackett ES. Laparoscopic Closure of the Nephrosplenic Space in Horses with Nephrosplenic Colonic Entrapment: Factors Associated with Survival and Colic Recurrence. Article. <i>Veterinary Surgery</i> . 2016;45:O60-O69. doi:10.1111/vsu.12549 | Retrospective cohort study      | North America | 49 | GI    | Treatment    | Standing   | x | X |
| 102. O'Neill HD. Hand-assisted laparoscopic reattachment of a mesoduodenojejunal defect in a broodmare. <i>Equine Veterinary Education</i> . 2019;32(10):e184-e188. doi:10.1111/eve.13110                                                                                                          | Case report                     | Europe        | 1  | GI    | Treatment    | Standing   | x | X |
| 103. O'Neill HD, Ricardi G. Concurrent repair of a displaced rib fracture and splenic capsular tearing using laparoscopic technique in a standing horse with acute haemoperitoneum. Article. <i>Equine Veterinary Education</i> . 2020;32(4):O19-O23. doi:10.1111/eve.13021                        | Case report                     | Europe        | 1  | Other | Treatment    | Standing   | x | X |
| 104. Ortis HA, Foss RR, McCue PM, Bradecamp EA, Ferris RA, Hendrickson DA. Laparoscopic application of PGE2 to the uterine tube surface enhances fertility in selected subfertile mares. <i>Journal of Equine Veterinary Science</i> . 2013;33(11):896-900. doi:10.1016/j.jevs.2013.01.003         | Prospective observational study | North America | 28 | UG    | Treatment    | Standing   | x |   |

|                                                                                                                                                                                                                                                                                                                              |                                 |               |               |       |                       |            |   |   |
|------------------------------------------------------------------------------------------------------------------------------------------------------------------------------------------------------------------------------------------------------------------------------------------------------------------------------|---------------------------------|---------------|---------------|-------|-----------------------|------------|---|---|
| 105. Ortved KF, Witte S, Fleming K, Nash J, Woolums AR, Peroni JF. Laparoscopic-assisted splenectomy in a horse with splnomegaly. <i>Equine Veterinary Education</i> . Jul 2008;20(7):357-361. doi:10.2746/095777308x320270                                                                                                  | Case report                     | North America | 1             | Other | Treatment             | Recumbency | x |   |
| 106. Pader K, Freeman LJ, Constable PD, Wu CC, Snyder PW, Lescun TB. Comparison of Transvaginal Natural Orifice Transluminal Endoscopic Surgery (NOTES) and Laparoscopy for Elective Bilateral Ovariectomy in Standing Mares. Article. <i>Veterinary Surgery</i> . 2011;40(8):998-1008. doi:10.1111/j.1532-950X.2011.00877.x | Experimental in vivo study      | North America | 6             | UG    | Experimental          | Standing   | x | X |
| 107. Pepe M, Gialletti R, Moriconi F, Puccetti M, Nannarone S, Singer ER. Laparoscopic sterilization of Sardinia donkeys using an endoscopic stapler. <i>Vet Surg</i> . May-Jun 2005;34(3):260-4. doi:10.1111/j.1532-950x.2005.00039.x                                                                                       | Prospective clinical study      | Europe        | 6             | UG    | Treatment             | Both       | x | X |
| 108. Petrizzi L, Guerri G, Stratico P, et al. Laparoscopic Ovariectomy in Standing Mule Mares. <i>Journal of Equine Veterinary Science</i> . Jan 2020;84102857. doi:10.1016/j.jevs.2019.102857                                                                                                                               | Prospective observational study | Europe        | 10            | UG    | Treatment             | Standing   | x |   |
| 109. Pye J, Galuppo L, Whitcomb MB, Clothier K, Byrne B. Isolation of campylobacter fetus subspecies fetus from an abdominal abscess in an adult mare. Article. <i>Canadian Veterinary Journal</i> . 2020;61(12):1307-1311.                                                                                                  | Case report                     | North America | 1             | Other | Diagnostic/Treatment  | Standing   |   | X |
| 110. Quere E, Bourzac C, Farfan M, Losada A, Volmer C, Mespoulhes-Riviere C. Standing Hand-Assisted Laparoscopic Diagnosis and Treatment of a Rare Case of Uterine Adenocarcinoma in an 18-Year-Old Mare. <i>Journal of Equine Veterinary Science</i> . Aug 2019;79:39-44. doi:10.1016/j.jevs.2019.05.021                    | Case report                     | Europe        | 1             | UG    | Treatment             | Standing   | x | X |
| 111. Radcliffe RM, Manchester AC, Mohammed HO, et al. Laparoscopic-Guided Compared to Skilled Instructor Support for Student Rectal Examination Training Using Live Horses in the Veterinary Curriculum. <i>Veterinary Surgery</i> . Apr 2015;44(3):352-358. doi:10.1111/j.1532-950X.2014.12278.x                            | Randomized clinical trial       | North America | Not specified | Other | Experimental/teaching | Standing   | x |   |
| 112. Ragle CA, Schneider RK. Ventral Abdominal Approach for Laparoscopic Ovariectomy in Horses. Article. <i>Veterinary Surgery</i> . 1995;24(6):492-497. doi:10.1111/j.1532-950X.1995.tb01360.x                                                                                                                              | Prospective observational study | North America | 15            | UG    | Treatment             | Recumbency | x | X |

|                                                                                                                                                                                                                                                                              |                            |               |     |       |                      |            |   |   |
|------------------------------------------------------------------------------------------------------------------------------------------------------------------------------------------------------------------------------------------------------------------------------|----------------------------|---------------|-----|-------|----------------------|------------|---|---|
| 113. Ragle CA, Yiannikouris S, Tibary AA, Fransson BA. Use of a barbed suture for laparoscopic closure of the internal inguinal rings in a horse. <i>Javma-Journal of the American Veterinary Medical Association</i> . Jan 2013;242(2):249-253. doi:10.2460/javma.242.2.249 | Case report                | North America | 1   | GI    | Treatment            | Standing   | x | X |
| 114. Rambags BPB, Stout TAE, Rijkenhuizen ABM. Ovarian granulosa cell tumours adherent to other abdominal organs; surgical removal from 2 Warmblood mares. <i>Equine Veterinary Journal</i> . Sep 2003;35(6):627-632. doi:10.2746/042516403775467261                         | Case report                | Europe        | 2   | UG    | Treatment            | Standing   | x | X |
| 115. Rijkenhuizen ABM. Laparoscopic repair of a traumatic ventral abdominal hernia using a mesh. <i>Equine Veterinary Education</i> . 2005;17(5):243-247. doi:10.1111/j.2042-3292.2005.tb00383.x                                                                             | Case report                | Europe        | 1   | Other | Treatment            | Recumbency | x |   |
| 116. Rijkenhuizen ABM, Dijk Pv. Diagnostic and therapeutic laparoscopy in the horse: experiences in 236 cases. <i>Pferdeheilkunde</i> . 2002;18(1):12-20.                                                                                                                    | Retrospective cohort study | Europe        | 236 | Both  | Diagnostic/Treatment | Both       |   |   |
| 117. Rijkenhuizen ABM, Goehring L, Lankveld DPK. Laparoscopic repair of a bladder rupture in 2 foals. <i>Pferdeheilkunde</i> . Jan-Feb 2003;19(1):9-15. doi:10.21836/pem20030101                                                                                             | Case report                | Europe        | 2   | UG    | Treatment            | Recumbency | x | X |
| 118. Rijkenhuizen ABM, Lichtenberg D, Weitkamp K. Cystic intra-abdominal testicles: Standing laparoscopic removal in two colts. <i>Equine Veterinary Education</i> . Aug 2020;32(8):E130-E135. doi:10.1111/eve.13030                                                         | Case report                | Europe        | 2   | UG    | Treatment            | Standing   | x | X |
| 119. Rijkenhuizen ABM, Loon TJAMv, Boswinkel M. Laparoscopic repair of a ruptured bladder in an adult mare. <i>Equine Veterinary Education</i> . 2008;20(4):183-189. doi:10.2746/095777308X292137                                                                            | Case report                | Europe        | 1   | UG    | Treatment            | Recumbency | x | X |
| 120. Rijkenhuizen ABM, van der Harst MR. Castration in the standing horse combining laparoscopic and conventional techniques. <i>Equine Veterinary Journal</i> . Nov 2017;49(6):776-779. doi:10.1111/evj.12681                                                               | Case series                | Europe        | 15  | UG    | Treatment            | Standing   | x |   |

|                                                                                                                                                                                                                                                                            |                                 |               |     |       |              |            |   |   |
|----------------------------------------------------------------------------------------------------------------------------------------------------------------------------------------------------------------------------------------------------------------------------|---------------------------------|---------------|-----|-------|--------------|------------|---|---|
| 121. Rocken M, Mosel G, Barske K, Witte TS. Thoracoscopic Diaphragmatic Hernia Repair in a Warmblood Mare. <i>Veterinary Surgery</i> . Jun 2013;42(5):591-594. doi:10.1111/j.1532-950X.2013.12009.x                                                                        | Case report                     | Europe        | 1   | Other | Treatment    | Standing   |   | X |
| 122. Röcken M, Mosel G, Seyrek-Intas K, et al. Unilateral and bilateral laparoscopic ovariectomy in 157 mares: a retrospective multicenter study. <i>Vet Surg</i> . Dec 2011;40(8):1009-14. doi:10.1111/j.1532-950X.2011.00884.x                                           | Retrospective case series       | Multicentric  | 157 | UG    | Treatment    | Standing   |   |   |
| 123. Röcken M, Mosel G, Stehle C, Rass J, Litzke LF. Left- and right-sided laparoscopic-assisted nephrectomy in standing horses with unilateral renal disease. <i>Vet Surg</i> . Aug 2007;36(6):568-72. doi:10.1111/j.1532-950X.2007.00306.x                               | Case report                     | Europe        | 3   | UG    | Treatment    | Standing   | x |   |
| 124. Röcken M, Schubert C, Mosel G, Litzke LF. Indications, surgical technique, and long-term experience with laparoscopic closure of the nephrosplenic space in standing horses. <i>Veterinary Surgery</i> . 2005;34(6):637-641. doi:10.1111/j.1532-950X.2005.00098.x     | Retrospective cohort study      | Europe        | 44  | Other | Treatment    | Standing   | x | X |
| 125. Röcken M, Stehle C, Mosel G, Rass J, Litzke LF. Laparoscopic-assisted cystotomy for urolith removal in geldings. <i>Vet Surg</i> . Jun 2006;35(4):394-7. doi:10.1111/j.1532-950X.2006.00163.x                                                                         | Case report                     | Europe        | 4   | UG    | Treatment    | Recumbency | x |   |
| 126. Rodgers DH, Belknap JK, Wilson DA. Laparoscopic ovariectomy using sequential electrocoagulation and sharp transection of the equine mesovarium. Article. <i>Veterinary Surgery</i> . 2001;30(6):572-579. doi:10.1053/jvet.2001.28435                                  | Prospective observational study | North America | 23  | UG    | Experimental | Standing   | x |   |
| 127. Rodgers DH, Brown MH, Watt BC, Keoughan CG, Hanrath M. Hand-assisted laparoscopic technique for removal of ovarian tumors in standing mares. <i>Journal of the American Veterinary Medical Association</i> . May 2002;220(10):1503-+. doi:10.2460/javma.2002.220.1503 | Case series                     | North America | 17  | UG    | Treatment    | Standing   | x | X |
| 128. Rodgers DH, Hanson RR. Ligature slippage during standing laparoscopic ovariectomy in a mare. <i>Can Vet J</i> . May 2000;41(5):395-7.                                                                                                                                 | Case report                     | North America | 1   | UG    | Treatment    | Standing   | x |   |

|                                                                                                                                                                                                                                                                                                                          |                            |               |    |       |                        |            |   |   |
|--------------------------------------------------------------------------------------------------------------------------------------------------------------------------------------------------------------------------------------------------------------------------------------------------------------------------|----------------------------|---------------|----|-------|------------------------|------------|---|---|
| 129. Roessner HA, Kurtz KA, Caron JP. Laparoscopic ovariectomy diminishes estrus-associated behavioral problems in mares. <i>Journal of Equine Veterinary Science</i> . 2015;35(3):250-253. doi:10.1016/j.jevs.2015.01.007                                                                                               | Case series                | North America | 20 | UG    | Treatment              | Standing   | x |   |
| 130. Romero A, Rodgeron DH, Fontaine GL. Hand-assisted laparoscopic removal of a nephroblastoma in a horse. <i>Can Vet J</i> . Jun 2010;51(6):637-9.                                                                                                                                                                     | Case report                | North America | 1  | UG    | Treatment              | Standing   |   |   |
| 131. Rossignol F, Mespoulhes-Riviere C, Vitte A, Lechartier A, Boening KJ. Standing Laparoscopic Inguinal Hernioplasty Using Cyanoacrylate for Preventing Recurrence of Acquired Strangulated Inguinal Herniation in 10 Stallions. <i>Veterinary Surgery</i> . Jan 2014;43(1):6-11. doi:10.1111/j.1532-950X.2013.12083.x | Case series                | Europe        | 10 | GI    | Treatment              | Standing   | x |   |
| 132. Rossignol F, Perrin R, Boening KJ. Laparoscopic hernioplasty in recumbent horses using transposition of a peritoneal flap. <i>Veterinary Surgery</i> . Aug 2007;36(6):557-562. doi:10.1111/j.1532-950X.2007.00282.x                                                                                                 | Prospective clinical study | Europe        | 13 | Other | Experimental/treatment | Recumbency | x | X |
| 133. Rubio-Martinez LM. Standing laparoscopic castration in an equine male pseudohermaphrodite. <i>Equine Veterinary Education</i> . Oct 2012;24(10):507-510. doi:10.1111/j.2042-3292.2011.00330.x                                                                                                                       | Case report                | Africa        | 1  | UG    | Treatment              | Standing   | x | X |
| 134. Sassot LN, Ragle CA, Farnsworth KD, Lund CM. Morcellation for testes extraction in horses undergoing standing laparoscopic cryptorchidectomy. Article. <i>Canadian Veterinary Journal</i> . 2017;58(11):1215-1220.                                                                                                  | Case report                | North America | 30 | UG    | Treatment              | Standing   | x |   |
| 135. Sherlock CE, Lott-Ellis K, Bergren A, Withers JM, Fewes D, Mair TS. Granulosa cell tumours in the mare: A review of 52 cases. <i>Equine Veterinary Education</i> . Feb 2016;28(2):75-82. doi:10.1111/eve.12449                                                                                                      | Retrospective case series  | Europe        | 38 | UG    | Treatment              | Standing   |   |   |
| 136. Smith LJ, Mair TS. Unilateral and bilateral laparoscopic ovariectomy of mares by electrocautery. <i>Veterinary Record</i> . 2008;163(10):297-300.                                                                                                                                                                   | Case series                | Europe        | 12 | UG    | Treatment              | Standing   | x | X |

|                                                                                                                                                                                                                                                                      |                            |               |    |       |              |            |   |   |
|----------------------------------------------------------------------------------------------------------------------------------------------------------------------------------------------------------------------------------------------------------------------|----------------------------|---------------|----|-------|--------------|------------|---|---|
| 137. Smith LJ, Perkins JD. Laparoscopic-assisted castration of a monorchid male pseudohermaphrodite pony. <i>Equine Veterinary Education</i> . Jun 2009;21(6):295-299. doi:10.2746/095777309x422979                                                                  | Case report                | Europe        | 1  | UG    | Treatment    | Recumbency | x |   |
| 138. Spagnolo JD, Castro LM, Correa RR, et al. Nephrosplenic Space Ablation in Horses After Homologous Pericardium Implant Using a Laparoscopic Stapler. <i>Journal of Equine Veterinary Science</i> . Dec 2020;95103275. doi:10.1016/j.jevs.2020.103275             | Experimental in vivo study | South America | 6  | Other | Experimental | Standing   | x |   |
| 139. Spagnolo JD, Sinhorini IL, Baccarin RYA, et al. Internal inguinal ring closure by laparoscopy using homologous pericardium grafts in horses. <i>Ciência Rural</i> . 2016;46(2):318-323. doi:10.1590/0103-8478cr20150042                                         | Experimental in vivo study | South America | 6  | Other | Experimental | Recumbency | x |   |
| 140. Spanton JA, Mair YS, Krudewig G. Pancreatic adenocarcinoma in a donkey. Use of laparoscopy to aid the diagnosis. <i>Equine Veterinary Education</i> . Jan 2009;21(1):19-24. doi:10.2746/095777308x382641                                                        | Case report                | Europe        | 1  | GI    | Diagnostic   | Standing   | x |   |
| 141. Stewart SG, Johnston JK, Parente EJ. Hand-assisted laparoscopic repair of a grade IV rectal tear in a postparturient mare. <i>J Am Vet Med Assoc</i> . Oct 1 2014;245(7):816-20. doi:10.2460/javma.245.7.816                                                    | Case report                | North America | 1  | GI    | Treatment    | Standing   | x |   |
| 142. Straticò P, Suriano R, Sciarrini C, Varasano V, Petrizzi L. Laparoscopic-assisted cystotomy and cystostomy for treatment of cystic calculus in a gelding. <i>Vet Surg</i> . Jul 2012;41(5):634-7. doi:10.1111/j.1532-950X.2011.00946.x                          | Case report                | Europe        | 1  | UG    | Treatment    | Recumbency | x |   |
| 143. Straticò P, Varasano V, Guerri G, Celani G, Palozzo A, Petrizzi L. A retrospective study of cryptorchidectomy in horses: Diagnosis, treatment, outcome and complications in 70 cases. Article. <i>Animals</i> . 2020;10(12):1-10. 2446. doi:10.3390/ani10122446 | Case series                | Europe        | 44 | UG    | Treatment    | Standing   |   | X |
| 144. Sutter WW, Hardy J. Laparoscopic repair of a small intestinal mesenteric rent in a broodmare. <i>Veterinary Surgery</i> . Jan-Feb 2004;33(1):92-95. doi:10.1111/j.1532-950x.2004.04012.x                                                                        | Case report                | North America | 6  | GI    | Treatment    | Standing   | x | X |

|                                                                                                                                                                                                                                                                         |                            |               |    |       |              |            |   |   |
|-------------------------------------------------------------------------------------------------------------------------------------------------------------------------------------------------------------------------------------------------------------------------|----------------------------|---------------|----|-------|--------------|------------|---|---|
| 145. Tate LP, Jr., Fogle CA, Bailey CS, Tate KB, Davis JW. Laparoscopic-assisted colpotomy for ovariectomy in the mare. <i>Veterinary Surgery</i> . 2012;41(5):625-628. doi:10.1111/j.1532-950X.2012.00993.x                                                            | Case series                | North America | 4  | UG    | Treatment    | Standing   | x | X |
| 146. Teixeira PPM, Fidelis OL, Medeiros RM, et al. Laparoscopic Adhesiolysis in a Mini Pony. <i>Acta Scientiae Veterinariae</i> . 2013;413.                                                                                                                             | Case report                | South America | 1  | Other | Treatment    | Recumbency | x | X |
| 147. Teixeira PPM, Medeiros RM, Silva MAM, et al. Laparoscopic-assisted Approach to the Pelvic Flexure for Surgical Treatment of Sand Impaction in a Horse. <i>Acta Scientiae Veterinariae</i> . 2015;4375.                                                             | Case report                | South America | 1  | GI    | Treatment    | Recumbency | x |   |
| 148. Teixeira PPM, Silva MAM, Coutinho LN, et al. ADAPT(tm) trocar use for laparoscopic procedures in equidea. <i>Arquivo Brasileiro de Medicina Veterinária e Zootecnia</i> . 2016;68(1):243-246. doi:10.1590/1678-4162-7861                                           | Experimental in vivo study | South America | 15 | other | Experimental | Standing   | x | X |
| 149. Trostle SS, White NA, Donaldson L, Freeman LJ, Hendrickson DA. Laparoscopic colopexy in horses. Article. <i>Veterinary Surgery</i> . 1998;27(1):56-63. doi:10.1111/j.1532-950X.1998.tb00098.x                                                                      | Experimental in vivo study | North America | 6  | GI    | Experimental | Recumbency | x | X |
| 150. Trumble TN, Ingle-Fehr J, Hendrickson DA. Laparoscopic intra-abdominal ligation of the testicular artery following castration in a horse. <i>Journal of the American Veterinary Medical Association</i> . May 2000;216(10):1596-+. doi:10.2460/javma.2000.216.1596 | Case report                | North America | 1  | UG    | Treatment    | Recumbency | x | X |
| 151. Tuohy JL, Hendrickson DA, Hendrix SM, Bohanon TC. Standing laparoscopic repair of a ruptured urinary bladder in a mature draught horse. <i>Equine Veterinary Education</i> . May 2009;21(5):257-261. doi:10.2746/095777309x409884                                  | Case report                | North America | 1  | UG    | Treatment    | Standing   | x | X |
| 152. van Bergen T, Wiemer P, Bosseler L, Ugahary F, Martens A. Development of a new laparoscopic Foramen Epiploicum Mesh Closure (FEMC) technique in 6 horses. <i>Equine Veterinary Journal</i> . May 2016;48(3):331-337. doi:10.1111/evj.12427                         | Experimental in vivo study | Europe        | 6  | GI    | Experimental | Standing   | x |   |

|                                                                                                                                                                                                                                                                                                                         |                            |               |     |    |              |            |   |   |
|-------------------------------------------------------------------------------------------------------------------------------------------------------------------------------------------------------------------------------------------------------------------------------------------------------------------------|----------------------------|---------------|-----|----|--------------|------------|---|---|
| 153. van Bergen T, Wiemer P, Schauvliege S, Paulussen E, Ugahary F, Martens A. Laparoscopic Evaluation of the Epiploic Foramen after Celiotomy for Epiploic Foramen Entrapment in the Horse. <i>Veterinary Surgery</i> . Jul 2016;45(5):596-601. doi:10.1111/vsu.12493                                                  | Case series                | Europe        | 7   | GI | Treatment    | Standing   |   | X |
| 154. Vitoria A, Romero A, Fuente S, Barrachina L, Vazquez FJ. Application of a laparoscopic technique for vasectomy in standing horses. <i>Veterinary Record</i> . Sep 2019;185(11)doi:10.1136/vetrec-2019-105396                                                                                                       | Experimental in vivo study | Europe        | 4   | UG | Experimental | Standing   | x |   |
| 155. Vitte A, Mespoulhès-Rivière C, Lechartier A, Rossignol F. Removal of cystic calculi using a transinguinal laparoscopic-assisted technique in two stallions. Article. <i>Equine Veterinary Education</i> . 2013;25(11):573-577. doi:10.1111/eve.12013                                                               | Case report                | Europe        | 2   | UG | Treatment    | Recumbency | x |   |
| 156. Vitte A, Rossignol F, Mespoulhès-Rivière C, Lechartier A, Röecken M. Two-Step Surgery Combining Standing Laparoscopy With Recumbent Ventral Median Celiotomy for Removal of Enlarged Pathologic Ovaries in 20 Mares. Article. <i>Veterinary Surgery</i> . 2014;43(6):663-667. doi:10.1111/j.1532-950X.2014.12229.x | Case series                | Europe        | 20  | UG | Treatment    | Both       | x |   |
| 157. Voermans M, Rijkenhuizen ABM, Velden MAVd. The complex blood supply to the equine testis as a cause of failure in laparoscopic castration. <i>Equine Veterinary Journal</i> . 2006;38(1):35-39. doi:10.2746/042516406775374234                                                                                     | Case series                | Europe        | 241 | UG | Treatment    | Standing   |   | X |
| 158. Waguespack R, Belknap J, Williams A. Laparoscopic management of postcastration haemorrhage in a horse. <i>Equine Vet J</i> . Sep 2001;33(5):510-3. doi:10.2746/042516401776254772                                                                                                                                  | Case report                | North America | 1   | UG | Treatment    | Standing   | x |   |
| 159. Walesby HA, Ragle CA, Booth LC. Laparoscopic repair of ruptured urinary bladder in a stallion. <i>J Am Vet Med Assoc</i> . Dec 15 2002;221(12):1737-41, 1715. doi:10.2460/javma.2002.221.1736                                                                                                                      | Case report                | North America | 1   | UG | Treatment    | Recumbency | x | X |
| 160. Wilderjans H, Meulyzer M. Laparoscopic closure of the vaginal rings in the standing horse using a tacked intraperitoneal slitted mesh (TISM) technique. <i>Equine Veterinary Journal</i> . 2021;54(2):359-367. doi:10.1111/evj.13454                                                                               | Retrospective case series  | Europe        | 17  | GI | Preventive   | Standing   | x | X |

|                                                                                                                                                                                                                                                                                          |             |              |    |    |            |          |   |   |
|------------------------------------------------------------------------------------------------------------------------------------------------------------------------------------------------------------------------------------------------------------------------------------------|-------------|--------------|----|----|------------|----------|---|---|
| 161. Wilderjans H, Meulyzer M, Simon O. Standing Laparoscopic Peritoneal Flap Hernioplasty Technique for Preventing Recurrence of Acquired Strangulating Inguinal Herniation in Stallions. Article. <i>Veterinary Surgery</i> . 2012;41(2):292-299. doi:10.1111/j.1532-950X.2011.00914.x | Case series | Europe       | 30 | GI | Preventive | Standing | x |   |
| 162. Witte TH, Wilke M, Stahl C, Jandová V, Haralampus R, Straub R. Use of a hand-assisted laparoscopic surgical technique for closure of an extensive mesojejunal rent in a horse. <i>J Am Vet Med Assoc</i> . Oct 15 2013;243(8):1166-9. doi:10.2460/javma.243.8.1166                  | Case report | Europe       | 1  | GI | Treatment  | Standing | x |   |
| 163. Woodford NS, Payne RJ, McCluskie LK. Laparoscopically-assisted ovariectomy in three mares with pyometra. <i>Equine Veterinary Education</i> . Feb 2014;26(2):75-78. doi:10.1111/eve.12094                                                                                           | Case report | Europe       | 3  | UG | Treatment  | Both     | x |   |
| 164. Worsman FCF, Barakzai SZ, Bont MPd, Turner S, Rubio-Martínez LM. Treatment of haemoperitoneum secondary to ruptured granulosa cell tumours in two mares. <i>Equine Veterinary Education</i> . 2020;32(2):71-77.                                                                     | Case report | Multicentric | 1  | UG | Treatment  | Both     |   |   |
| 165.                                                                                                                                                                                                                                                                                     |             |              |    |    |            |          |   | X |
| 166.                                                                                                                                                                                                                                                                                     |             |              |    |    |            |          |   |   |
| 167.                                                                                                                                                                                                                                                                                     |             |              |    |    |            |          |   |   |
| 168.                                                                                                                                                                                                                                                                                     |             |              |    |    |            |          |   |   |

|      |  |  |  |  |  |  |  |   |
|------|--|--|--|--|--|--|--|---|
| 169. |  |  |  |  |  |  |  | X |
| 170. |  |  |  |  |  |  |  |   |
| 171. |  |  |  |  |  |  |  |   |
| 172. |  |  |  |  |  |  |  | X |
| 173. |  |  |  |  |  |  |  | X |
| 174. |  |  |  |  |  |  |  |   |
| 175. |  |  |  |  |  |  |  |   |
| 176. |  |  |  |  |  |  |  | X |

|                                                                                                                                                                                                                                               |                            |                 |                   |                                |                                                               |                            |                         |   |
|-----------------------------------------------------------------------------------------------------------------------------------------------------------------------------------------------------------------------------------------------|----------------------------|-----------------|-------------------|--------------------------------|---------------------------------------------------------------|----------------------------|-------------------------|---|
| 177.                                                                                                                                                                                                                                          |                            |                 |                   |                                |                                                               |                            |                         |   |
| 178.                                                                                                                                                                                                                                          |                            |                 |                   |                                |                                                               |                            |                         |   |
| 179.                                                                                                                                                                                                                                          |                            |                 |                   |                                |                                                               |                            |                         | x |
| 180.                                                                                                                                                                                                                                          |                            |                 |                   |                                |                                                               |                            |                         |   |
| 181.                                                                                                                                                                                                                                          |                            |                 |                   |                                |                                                               |                            |                         |   |
| 182. <b>References</b>                                                                                                                                                                                                                        | <b>Type of study</b>       | <b>Location</b> | <b>N of cases</b> | <b>Apparatus (GI/UG/other)</b> | <b>Purpose (diagnostic/treatment/preventive/experimental)</b> | <b>Standing/Recumbency</b> | <b>Pneumoperitoneum</b> |   |
| 183. Al-Badrany MS. Laparoscopic ovariectomy in standing donkeys by titanium clips and monopolar electrocautery. <i>Journal of Animal and Veterinary Advances</i> . 2007;6(5):663-667.                                                        | Experimental in vivo study | Asia            | 6                 | UG                             | Experimental                                                  | Standing                   | x                       | X |
| 184. Albanese V, Hanson RR, McMaster MA, Koehler JW, Caldwell FJ. Use of a Barbed Knotless Suture for Laparoscopic Ablation of the Nephrosplenic Space in 8 Horses. <i>Veterinary Surgery</i> . Aug 2016;45(6):824-830. doi:10.1111/vsu.12520 | Experimental in vivo study | North America   | 8                 | Other                          | Preventive                                                    | Standing                   |                         |   |

|                                                                                                                                                                                                                                                                                                                                          |                                 |               |    |       |              |            |   |   |
|------------------------------------------------------------------------------------------------------------------------------------------------------------------------------------------------------------------------------------------------------------------------------------------------------------------------------------------|---------------------------------|---------------|----|-------|--------------|------------|---|---|
| 185. Alldredge JG, Hendrickson DA. Use of high-power ultrasonic shears for laparoscopic ovariectomy in mares. Article. <i>Journal of the American Veterinary Medical Association</i> . 2004;225(10):1578-1580. doi:10.2460/javma.2004.225.1578                                                                                           | Prospective observational study | North America | 10 | UG    | Treatment    | Standing   | x |   |
| 186. Alsafy MAM, El-Kammar MH, Kassem MM, El-Gendy SAA, El-Khamary AN. Laparoscopic Anatomy of the Abdomen and Laparoscopic Ligating Loops, Electrocoagulation, and a Novel Modified Electroligation Ovariectomy in Standing Mare. <i>Journal of Equine Veterinary Science</i> . Nov 2013;33(11):912-923. doi:10.1016/j.jevs.2013.01.007 | Experimental in vivo study      | Asia          | 9  | UG    | Experimental | Standing   | x |   |
| 187. Arévalo Rodríguez JM, Grulke S, Salciccia A, De La Rebière De Pouyade G. Nephrosplenic space closure significantly decreases recurrent colic in horses: A retrospective analysis. Note. <i>Veterinary Record</i> . 2019;185(21):657. doi:10.1136/vr.105458                                                                          | Retrospective case-control      | Europe        | 42 | Other | Preventive   | Standing   |   |   |
| 188. Aziz DM, Al-Badrany MS, Taha MB. Laparoscopic ovariectomy in standing donkeys by using a new instrument. <i>Animal Reproduction Science</i> . Aug 2008;107(1-2):107-114. doi:10.1016/j.anireprosci.2007.06.011                                                                                                                      | Experimental in vivo study      | Asia          | 6  | UG    | Experimental | Standing   | x | X |
| 189. Barrell EA, Kamm JL, Hendrickson DA. Recurrence of renosplenic entrapment after renosplenic space ablation in a seven-year-old stallion. <i>Journal of the American Veterinary Medical Association</i> . 2011;239(4):504-507. doi:10.2460/javma.239.4.504                                                                           | Case report                     | North America | 1  | GI    | Treatment    | Standing   | x |   |
| 190. Bartmann CP, Lorber KJ. Laparoscopic gonadectomy in two half-sister horses with male pseudohermaphroditism of the testicular feminisation type. <i>Equine Veterinary Education</i> . 2003;15(6):299-304. doi:10.1111/j.2042-3292.2003.tb00253.x                                                                                     | Case report                     | Europe        | 2  | UG    | Treatment    | Standing   | x |   |
| 191. Bleyaert HF, Brown MP, Bonenclark G, Bailey JE. Laparoscopic adhesiolysis in a horse. <i>Veterinary Surgery</i> . Nov-Dec 1997;26(6):492-496. doi:10.1111/j.1532-950X.1997.tb00522.x                                                                                                                                                | Case report                     | North America | 1  | GI    | Treatment    | Recumbency | x | X |
| 192. Bont MPd, Wilderjans H, Simon O. Standing laparoscopic ovariectomy technique with intraabdominal dissection for removal of large pathologic ovaries in mares. <i>Veterinary Surgery</i> . 2010;39(6):737-741.                                                                                                                       | Case series                     | Europe        | 43 | UG    | Treatment    | Standing   | x |   |

|                                                                                                                                                                                                                                                                                                                                                                                                                                                                                                                                                                                                                                                                                                         |                                 |               |              |                   |                                           |                                |             |   |
|---------------------------------------------------------------------------------------------------------------------------------------------------------------------------------------------------------------------------------------------------------------------------------------------------------------------------------------------------------------------------------------------------------------------------------------------------------------------------------------------------------------------------------------------------------------------------------------------------------------------------------------------------------------------------------------------------------|---------------------------------|---------------|--------------|-------------------|-------------------------------------------|--------------------------------|-------------|---|
| 193. Bouré LP, Pearce SG, Kerr CL, et al. Evaluation of laparoscopic adhesiolysis for the treatment of experimentally induced adhesions in pony foals. Article. <i>American Journal of Veterinary Research</i> . 2002;63(2):289-294. doi:10.2460/ajvr.2002.63.289                                                                                                                                                                                                                                                                                                                                                                                                                                       | Experimental in vivo study      | North America | 8            | GI                | Experimental                              | Recumbency                     | x           | X |
| 194. Bouré L, Marcoux M, Laverty S. Laparoscopic abdominal anatomy of foals positioned in dorsal recumbency. Article. <i>Veterinary Surgery</i> . 1997;26(1):1-6. doi:10.1111/j.1532-950X.1997.tb01455.x<br>195. Bouré L, Marcoux M, Laverty S. Paralumbar fossa laparoscopic ovariectomy in horses with use of Endoloop ligatures. Article. <i>Veterinary Surgery</i> . 1997;26(6):478-483. doi:10.1111/j.1532-950X.1997.tb00520.x<br>196. Bracamonte JL, Bouré LP, Geor RJ, et al. Evaluation of a laparoscopic technique for collection of serial full-thickness small intestinal biopsy specimens in standing sedated horses. <i>Am J Vet Res</i> . Mar 2008;69(3):431-9. doi:10.2460/ajvr.69.3.431 | Experimental in vivo study      | North America | 2<br>7<br>13 | Other<br>UG<br>GI | Experimental<br>Treatment<br>Experimental | Recumbency<br>Both<br>Standing | x<br>x<br>x | X |
|                                                                                                                                                                                                                                                                                                                                                                                                                                                                                                                                                                                                                                                                                                         | Experimental in vivo study      | North America |              |                   |                                           |                                |             |   |
|                                                                                                                                                                                                                                                                                                                                                                                                                                                                                                                                                                                                                                                                                                         | Experimental in vivo study      | North America |              |                   |                                           |                                |             |   |
| 197. Bracamonte JL, Duke-Novakovski T. A pilot study evaluating laparoscopic closure of the nephrosplenic space using an endoscopic suturing device in standing horses. <i>Canadian Veterinary Journal-Revue Veterinaire Canadienne</i> . Jun 2016;57(6):651-654.                                                                                                                                                                                                                                                                                                                                                                                                                                       | Prospective observational study | North America | 4            | Other             | Experimental                              | Standing                       | x           |   |
| 198. Bracamonte JL, Thomas KL. Laparoscopic cryptorchidectomy with a vessel-sealing device in dorsal recumbent horses: 43 cases. Article. <i>Veterinary Surgery</i> . 2017;46(4):559-565. doi:10.1111/vsu.12624                                                                                                                                                                                                                                                                                                                                                                                                                                                                                         | Retrospective case series       | North America | 43           | UG                | Treatment                                 | Recumbency                     | x           | X |
| 199. Brink P, Schumacher J. Elevating the uterus (uteropexy) of five mares by laparoscopically imbricating the mesometrium. <i>Equine Veterinary Journal</i> . Nov 2010;42(8):675-679. doi:10.1111/j.2042-3306.2010.00069.x                                                                                                                                                                                                                                                                                                                                                                                                                                                                             | Retrospective case series       | North America | 5            | UG                | Treatment                                 | Standing                       | x           |   |
| 200. Brommer H, Grinwis GCM, van Loon V, Ensink JM. Laparoscopic-assisted diagnosis of anomalous unilateral abdominal cryptorchidism. <i>Equine Veterinary Education</i> . Aug 2011;23(8):391-395. doi:10.1111/j.2042-3292.2011.00243.x                                                                                                                                                                                                                                                                                                                                                                                                                                                                 | Case report                     | Europe        | 1            | UG                | Diagnostic                                | Standing                       | x           |   |

|                                                                                                                                                                                                                                          |                                 |               |    |       |                      |            |   |   |
|------------------------------------------------------------------------------------------------------------------------------------------------------------------------------------------------------------------------------------------|---------------------------------|---------------|----|-------|----------------------|------------|---|---|
| 201. Brugmans F, Deegen E. Laparoscopic surgical technique for repair of rectal and colonic tears in horses: An experimental study. Article. <i>Veterinary Surgery</i> . 2001;30(5):409-416. doi:10.1053/jvet.2001.25864                 | Experimental in vivo study      | Europe        | 3  | GI    | Experimental         | Recumbency | x | X |
| 202. Burke MJ, Parente EJ. Prosthetic Mesh for Obliteration of the Nephrosplenic Space in Horses: 26 Clinical Cases. Article. <i>Veterinary Surgery</i> . 2016;45(2):201-207. doi:10.1111/vsu.12434                                      | Retrospective case series       | North America | 26 | Other | Preventive           | Standing   | x | X |
| 203. Busschers E, Southwood LL, Parente EJ. Laparoscopic diagnosis and correction of a nephrosplenic entrapment of the large colon in a horse. <i>Equine Veterinary Education</i> . Mar 2007;19(2):60-63. doi:10.2746/095777307x181889   | Case report                     | North America | 1  | GI    | Diagnostic/treatment | Standing   | x | X |
| 204. Butt TD, Wilson DG. Laparoscopic colopexy in a horse. <i>Can Vet J</i> . Jul 2003;44(7):586-8.                                                                                                                                      | Case report                     | North America | 1  | GI    | Preventive           | Recumbency | x | X |
| 205. Carluccio A, de Amicis I, Petrizzi L, et al. Laparoscopic drainage of an ovarian haematoma in a Martina Franca jenny ( <i>Equus asinus</i> ). Article. <i>Veterinari Medicina</i> . 2020;65(8):358-363. doi:10.17221/29/2020-VETMED | Case report                     | Europe        | 1  | UG    | Treatment            | Standing   | x |   |
| 206. Caron JP, Brakenhoff J. Intracorporeal suture closure of the internal inguinal and vaginal rings in foals and horses. Article. <i>Veterinary Surgery</i> . 2008;37(2):126-131. doi:10.1111/j.1532-950X.2007.00366.x                 | Case series                     | North America | 8  | UG    | Treatment/preventive | Recumbency | x |   |
| 207. Caron JP, Mehler SJ. Laparoscopic mesh incisional hernioplasty in five horses. Article. <i>Veterinary Surgery</i> . 2009;38(3):318-325. doi:10.1111/j.1532-950X.2009.00511.x                                                        | Case series                     | North America | 5  | Other | Treatment            | Recumbency | x |   |
| 208. Cokelaere SM, Martens AMJG, Wiemer P. Laparoscopic ovariectomy in mares using a polyamide tie-rap. Article. <i>Veterinary Surgery</i> . 2005;34(6):651-656. doi:10.1111/j.1532-950X.2005.00101.x                                    | Prospective observational study | Europe        | 10 | UG    | Experimental         | Standing   | x | X |

|                                                                                                                                                                                                                                                                                                                                                         |                                 |               |    |       |                      |          |   |   |
|---------------------------------------------------------------------------------------------------------------------------------------------------------------------------------------------------------------------------------------------------------------------------------------------------------------------------------------------------------|---------------------------------|---------------|----|-------|----------------------|----------|---|---|
| 209. Cokelaere SM, Martens A, Vanschandevijl K, Wilderjans H, Steenhaut M. Hand-assisted laparoscopic nephrectomy after initial ureterocystostomy in a Shire filly with left ureteral ectopia. <i>Vet Rec.</i> Sep 22 2007;161(12):424-7. doi:10.1136/vr.161.12.424                                                                                     | Case report                     | Europe        | 1  | UG    | Treatment            | Standing |   |   |
| 210. Colbath AC, Hackett ES, Lesser CS, Hendrickson DA. Left paralumbar laparoscopic bilateral ovariectomy in mares. <i>Veterinary Surgery.</i> May 2017;46(4):574-579. doi:10.1111/vsu.12637                                                                                                                                                           | Prospective observational study | North America | 20 | UG    | Experimental         | Standing | x |   |
| 211. Collar EM, Duesterdieck-Zellmer KF, Huber MJ, Semevolos SA, Parker JE, Husby KA. Outcome of bilateral equid laparoscopic ovariectomies. Article. <i>Veterinary Surgery.</i> 2021;50(5):975-983. doi:10.1111/vsu.13651                                                                                                                              | Retrospective cohort study      | North America | 51 | UG    | Treatment/preventive | Standing | x | X |
| 212. Comino F, Röcken M, Gorvy D. Standing laparoscopy combined with a conventional inguinal approach to treat extended septic funiculitis in 12 horses. <i>Vet Surg.</i> Apr 18 2022;doi:10.1111/vsu.13809                                                                                                                                             | Retrospective case series       | Multicentric  | 12 | UG    | Treatment            | Standing | x |   |
| 213. Corsalini J, Gialletti R, Lotto E, Nannarone S. Laparoscopic Uteropexy (Mesometrium Imbrication) in Three Mares Using a Barbed Suture. <i>Journal of Equine Veterinary Science.</i> May 2016;40:102-105. doi:10.1016/j.jevs.2016.02.236                                                                                                            | Prospective observational study | Europe        | 3  | UG    | Treatment            | Standing | x |   |
| 214. Cribb NC, Arroyo LG, Boure L. Standing laparoscopic abdominal lavage using a suction-irrigation device in 2 horses with primary suppurative peritonitis. <i>Canadian Veterinary Journal-Revue Veterinaire Canadienne.</i> Apr 2021;62(4):397-402.                                                                                                  | Case report                     | North America | 2  | Other | Treatment            | Standing |   | X |
| 215. Cribb NC, Boure LP. Laparoscopic Removal of a Large Abdominal Testicular Teratoma in a Standing Horse. <i>Veterinary Surgery.</i> Jan 2010;39(1):131-135. doi:10.1111/j.1532-950X.2009.00618.x                                                                                                                                                     | Case report                     | North America | 1  | UG    | Treatment            | Standing | x |   |
| 216. Cribb NC, Koenig J, Sorge U. Comparison of laparoscopic versus conventional open cryptorchidectomies on intraoperative and postoperative complications and duration of surgery, anesthesia, and hospital stay in horses. <i>Javma-Journal of the American Veterinary Medical Association.</i> Apr 2015;246(8):885-892. doi:10.2460/javma.246.8.885 | Retrospective cohort study      | North America | 46 | UG    | Treatment            | Standing |   | X |

|                                                                                                                                                                                                                                                                                               |                            |               |    |       |              |            |   |   |
|-----------------------------------------------------------------------------------------------------------------------------------------------------------------------------------------------------------------------------------------------------------------------------------------------|----------------------------|---------------|----|-------|--------------|------------|---|---|
| 217. Cypher EE, Blackford J, Snowden RT, Sexton JA, Schumacher J. Surgical correction of entrapment of the large colon and caecum through a mesoduodenal rent with standing laparoscopic repair in a mare. <i>Equine Veterinary Education</i> . Apr 2020;32(4):185-188. doi:10.1111/eve.12941 | Case report                | North America | 1  | GI    | Treatment    | Standing   | x | X |
| 218. Daniel AJ, Easley JT, Story MR, Hendrickson DA, Hackett ES. Standing hand-assisted laparoscopic removal of large granulosa cell tumours in horses using a specimen retrieval bag and morcellator. <i>Equine Veterinary Education</i> . Oct 2015;27(10):505-509. doi:10.1111/eve.12374    | Case report                | North America | 3  | UG    | Treatment    | Standing   | x |   |
| 219. Daniel A, McCue P, Ferris R, Miller C, Leise B. Bilateral ovarian leiomyoma treated by standing laparoscopic ovariectomy. <i>Equine Veterinary Education</i> . Oct 2015;27(10):510-514. doi:10.1111/eve.12438                                                                            | Case report                | North America | 1  | UG    | Treatment    | Standing   | x |   |
| 220. Davis EW. Laparoscopic cryptorchidectomy in standing horses. <i>Veterinary Surgery</i> . Jul-Aug 1997;26(4):326-331. doi:10.1111/j.1532-950X.1997.tb01505.x                                                                                                                              | Prospective clinical study | North America | 11 | UG    | Treatment    | Standing   | x |   |
| 221. de Fourmestreaux C, Geffroy O, Siliart B, Albaric O, Tessier C. Evaluation of success rate of laparoscopic castration without orchidectomy in 32 mature horses. <i>Equine Veterinary Education</i> . Jan 2014;26(1):34-39. doi:10.1111/eve.12089                                         | Retrospective case series  | Europe        | 32 | UG    | Treatment    | Standing   |   | X |
| 222. Delcazo M, Geburek F, Kohler K, Rocken M, Theiss F. Laparoscopic resection of an exostosis of the os pubis in a horse. <i>Veterinary Surgery</i> . Apr 2020;49(3):614-620. doi:10.1111/vsu.13349                                                                                         | Case report                | Europe        | 1  | Other | Treatment    | Standing   | x |   |
| 223. Delli-Rocili MM, Cribb NC, Trout DR, Thomason JJ, Valverde A. Effectiveness of a paravertebral nerve block versus local portal blocks for laparoscopic closure of the nephrosplenic space: A pilot study. <i>Veterinary Surgery</i> . Jul 2020;49(5):1007-1014. doi:10.1111/vsu.13452    | Randomized clinical trial  | North America | 12 | Other | Experimental | Standing   |   |   |
| 224. Delling U, Howard RD, Pleasant RS, Lanz OI. Hand-assisted laparoscopic ovariohysterectomy in the mare. <i>Vet Surg</i> . Sep-Oct 2004;33(5):487-94. doi:10.1111/j.1532-950x.2004.04063.x                                                                                                 | Experimental in vivo study | North America | 8  | UG    | Experimental | Recumbency | x |   |

|                                                                                                                                                                                                                                                                      |                                 |               |    |       |                      |          |   |   |
|----------------------------------------------------------------------------------------------------------------------------------------------------------------------------------------------------------------------------------------------------------------------|---------------------------------|---------------|----|-------|----------------------|----------|---|---|
| 225. Delling U, Stoebe S, Brehm W. Hand-assisted laparoscopic adhesiolysis of extensive small intestinal adhesions in a mare after breeding injury. <i>Equine Veterinary Education</i> . Nov 2012;24(11):545-551. doi:10.1111/j.2042-3292.2011.00333.x               | Case report                     | Europe        | 1  | GI    | Treatment            | Standing | x |   |
| 226. Desmaizières LM, Martinot S, Lepage OM, Bareiss E, Cadore JL. Complications associated with cannula insertion techniques used for laparoscopy in standing horses. Article. <i>Veterinary Surgery</i> . 2003;32(6):501-506. doi:10.1111/j.1532-950X.2003.00501.x | Retrospective cohort study      | Europe        | 40 | Other | Diagnostic/treatment | Standing | x | X |
| 227. Devick IF, Hendrickson DA. Left paralumbar fossa approach combined with mesocolon fenestration for bilateral equine ovariectomy. <i>Vet Surg</i> . Jul 2019;48(5):735-741. doi:10.1111/vsu.13166                                                                | Experimental in vivo study      | North America | 5  | UG    | Experimental         | Standing | x |   |
| 228. Devick IF, Leise BS, Rao S, Hendrickson DA. Evaluation of post-operative pain after active desufflation at completion of laparoscopy in mares undergoing ovariectomy. <i>Canadian Veterinary Journal-Revue Veterinaire Canadienne</i> . Mar 2018;99(3):261-266. | Prospective observational study | North America | 38 | UG    | Treatment            | Standing | x |   |
| 229. Diekstaal M, Rijkenhuizen A. Mesorectal hematoma associated with colic and caudal neurological signs in a horse. <i>Pferdeheilkunde</i> . May-Jun 2018;34(3):232-236. doi:10.21836/pem20180303                                                                  | Case report                     | Europe        | 1  | Other | Diagnostic           | Standing | x | X |
| 230. Diekstaal M, Rohde C, Rijkenhuizen ABM. Post-partum uterine rupture: Standing repair in three mares using a laparoscopic technique. <i>Equine Veterinary Education</i> . Jun 2020;32(6):319-324. doi:10.1111/eve.13001                                          | Prospective observational study | Europe        | 3  | UG    | Treatment            | Standing | x |   |
| 231. Düsterdieck KF, Pleasant RS, Lanz OI, Saunders G, Howard RD. Evaluation of the harmonic scalpel for laparoscopic bilateral ovariectomy in standing horses. <i>Vet Surg</i> . May-Jun 2003;32(3):242-50. doi:10.1053/jvet.2003.50022                             | Experimental in vivo study      | North America | 8  | UG    | Experimental         | Standing | x | X |
| 232. Easley JT, McGilvray KC, Hendrickson DA, Bruemmer J, Hackett ES. Vessel sealer and divider instrument temperature during laparoscopic ovariectomy in horses. Article. <i>Veterinary Surgery</i> . 2018;47:O26-O31. doi:10.1111/vsu.12755                        | Prospective observational study | North America | 15 | UG    | Experimental         | Standing | x | X |

|                                                                                                                                                                                                                                                            |                            |               |    |       |              |            |   |   |
|------------------------------------------------------------------------------------------------------------------------------------------------------------------------------------------------------------------------------------------------------------|----------------------------|---------------|----|-------|--------------|------------|---|---|
| 233. El-Sherif MW, El-Khamary AN, Abdel-Wahed RE. Lateral versus dorsal recumbent laparoscopic cryptorchidectomy and castration in horses. <i>Online Journal of Veterinary Research</i> . 2017;21(8):523-530.                                              | Prospective case-control   | Asia          | 20 | UG    | Treatment    | Recumbency |   |   |
| 234. Epstein KL, Parente EJ. Laparoscopic obliteration of the nephrosplenic space using polypropylene mesh in five horses. <i>Veterinary Surgery</i> . Jul 2006;35(5):431-437. doi:10.1111/j.1532-950X.2006.00171.x                                        | Experimental in vivo study | North America | 5  | Other | Experimental | Standing   |   | X |
| 235. Farstvedt E, Hendrickson D. Laparoscopic closure of the nephrosplenic space for prevention of recurrent nephrosplenic entrapment of the ascending colon. <i>Veterinary Surgery</i> . Nov-Dec 2005;34(6):642-645. doi:10.1111/j.1532-950X.2005.00099.x | Retrospective case series  | North America | 10 | Other | Preventive   | Standing   | x |   |
| 236. Fernández-Parra R, Losada-Florian A, Zilberstein L, Bourzac C. Iatrogenic pneumothorax-induced heart murmur during standing laparoscopy in a 3-year-old horse. Article. <i>Equine Veterinary Education</i> . 2022;doi:10.1111/eve.13641               | Case report                | Europe        | 1  | Other | Preventive   | Standing   | x | X |
| 237. Finley CJ, Fischer AT. Removal of equine cryptorchid testes through an enlarged umbilical portal in dorsally recumbent horses after intra-abdominal laparoscopic castration. <i>Equine Veterinary Journal</i> . doi:10.1111/evj.13483                 | Retrospective case series  | North America | 79 | UG    | Treatment    | Recumbency | x |   |
| 238. Gablehouse KB, Cary J, Farnsworth K, Ragle CA. Standing laparoscopic-assisted vaginal ovariectomy in a mare. <i>Equine Veterinary Education</i> . Jun 2009;21(6):303-306. doi:10.2746/095777309x446603                                                | Case report                | North America | 1  | UG    | Treatment    | Standing   | x | X |
| 239. Gandini M, Giusto G, Caramello V, Comino F, Rosso A. Single-port laparoscopic incisional hernia repair in a horse. <i>Equine Veterinary Education</i> . Jul 2017;29(7):362-366. doi:10.1111/eve.12547                                                 | Case report                | Europe        | 1  | Other | Treatment    | Recumbency | x | X |
| 240. Gandini M, Labate F, Rosso A, Giusto G. Strangulating obstruction of the small intestine by a fibrous band originating on the nephrosplenic ligament. <i>Equine Veterinary Education</i> . May 2021;33(5):E146-E148. doi:10.1111/eve.13206            | Case report                | Europe        | 1  | GI    | Treatment    | Standing   | x | X |

|                                                                                                                                                                                                                                                                                                                   |                            |               |    |       |            |            |   |   |
|-------------------------------------------------------------------------------------------------------------------------------------------------------------------------------------------------------------------------------------------------------------------------------------------------------------------|----------------------------|---------------|----|-------|------------|------------|---|---|
| 241. Gandini M, Nannarone S, Giusto G, et al. Laparoscopic nephrosplenic space ablation with barbed suture in eight horses. <i>Javma-Journal of the American Veterinary Medical Association</i> . Feb 2017;250(4):431-436. doi:10.2460/javma.250.4.431                                                            | Case series                | Europe        | 8  | Other | Preventive | Standing   |   |   |
| 242. Gardner AK, Santschi EM, Aeffner F, Pigott JH, Russell DS. Testicular ischaemic necrosis as a cause of equine cryptorchidism. Article. <i>Equine Veterinary Education</i> . 2017;29(6):314-317. doi:10.1111/eve.12544                                                                                        | Case report                | North America | 1  | UG    | Treatment  | Recumbency | x |   |
| 243. Gialletti R, Nannarone S, Gandini M, et al. Comparison of Mesh and Barbed Suture for Laparoscopic Nephrosplenic Space Ablation in Horses. <i>Animals</i> . Apr 2021;11(4)1096. doi:10.3390/ani11041096                                                                                                       | Retrospective case-control | Europe        | 28 | Other | Preventive | Standing   | x |   |
| 244. Goodin JT, Rodgerson DH, Gomez JH. Standing Hand-Assisted Laparoscopic Ovariectomy in 65 Mares. Article. <i>Veterinary Surgery</i> . 2011;40(1):90-92. doi:10.1111/j.1532-950X.2010.00771.x                                                                                                                  | Case series                | North America | 65 | UG    | Treatment  | Standing   |   | X |
| 245. Goto A, Tagami M, Kato F, et al. Equine nonneoplastic abnormal ovary in a draft mare with high serum anti-Müllerian hormone: a case study. <i>Journal of Equine Science</i> . 2021;32(4):147-151. doi:10.1294/jes.32.147                                                                                     | Case report                | Asia          | 1  | UG    | Treatment  | Standing   | x | X |
| 246. Gottschalk RD, Berg SSvd. Standing laparoscopically-aided ovariectomy in mares. <i>Journal of the South African Veterinary Association</i> . 1997;68(3):102-104.                                                                                                                                             | Case series                | Africa        | 13 | UG    | Treatment  | Standing   |   |   |
| 247. Gracia-Calvo LA, Duque J, Balao da Silva C, Ezquerro J, Ortega-Ferrusola C. Testicular perfusion after standing laparoscopic peritoneal flap hernioplasty in stallions. Article. <i>Theriogenology</i> . 2015;84(5):797-804. doi:10.1016/j.theriogenology.2015.05.014                                        | Case series                | Europe        | 6  | UG    | Treatment  | Standing   |   | X |
| 248. Gracia-Calvo LA, Ezquerro LJ, Martín-Cuervo M, et al. Standing laparoscopic peritoneal flap hernioplasty of the vaginal rings does not modify the sperm production and motility characteristics in intact male horses. <i>Reproduction in Domestic Animals</i> . 2014;49(6):1043-1048. doi:10.1111/rda.12434 | Case series                | Europe        | 6  | UG    | Preventive | Standing   |   |   |

|                                                                                                                                                                                                                                                                           |                              |               |    |       |                      |          |   |   |
|---------------------------------------------------------------------------------------------------------------------------------------------------------------------------------------------------------------------------------------------------------------------------|------------------------------|---------------|----|-------|----------------------|----------|---|---|
| 249. Gracia-Calvo LA, Ezquerro LJ, Ortega-Ferrusola C, et al. Histological findings in equine testes one year after standing laparoscopic peritoneal flap hernioplasty. Article. <i>Veterinary Record</i> . 2016;178(18):450. doi:10.1136/vr.103236                       | Case series                  | Europe        | 10 | Other | Preventive           | Standing |   |   |
| 250. Gracia-Calvo L, Martín-Cuervo M, Jiménez J, et al. Development of a technique for standing hand-assisted laparoscopic splenectomy in five horses. Article. <i>Australian Veterinary Journal</i> . 2015;93(6):183-188. doi:10.1111/avj.12326                          | Case series                  | Europe        | 5  | Other | Experimental         | Standing | x |   |
| 251. Hand R, Rakestraw P, Taylor T. Evaluation of a vessel-sealing device for use in laparoscopic ovariectomy in mares. <i>Vet Surg</i> . May-Jun 2002;31(3):240-4. doi:10.1053/jvet.2002.33482                                                                           | Prospective clinical study   | North America | 13 | UG    | Preventive           | Standing | x |   |
| 252. Hanrath M, Rodgers DH. Laparoscopic cryptorchidectomy using electrosurgical instrumentation in standing horses. Article. <i>Veterinary Surgery</i> . 2002;31(2):117-124. doi:10.1053/jvet.31049                                                                      | Retrospective clinical study | North America | 10 | UG    | Treatment            | Standing | x |   |
| 253. Hanson CA, Galuppo LD. Bilateral laparoscopic ovariectomy in standing mares: 22 Cases. Article. <i>Veterinary Surgery</i> . 1999;28(2):106-112. doi:10.1053/jvet.1999.0106                                                                                           | Prospective clinical study   | North America | 22 | UG    | Treatment            | Standing | x |   |
| 254. Hendrickson DA, Wilson DG. Laparoscopic cryptorchid castration in standing horses. <i>Veterinary Surgery</i> . Jul-Aug 1997;26(4):335-339. doi:10.1111/j.1532-950X.1997.tb01507.x                                                                                    | Prospective clinical study   | North America | 8  | UG    | Diagnostic/Treatment | Standing | x | X |
| 255. Hilton HG, Aleman M, Maher O, Peterson TS, Whitcomb MB, Galuppo LD. Hand-assisted laparoscopic nephrectomy in a standing horse for the management of renal cell carcinoma. <i>Equine Veterinary Education</i> . May 2008;20(5):239-244. doi:10.2746/095777308x295783 | Case report                  | North America | 1  | Other | Treatment            | Standing | x | X |
| 256. Holmes JM, Nath LC, Muirlink MA. Laparoscopic cauterisation of the testicular arteries to manage haemoperitoneum in a gelding. <i>Equine Veterinary Education</i> . Jun 2013;25(6):297-300. doi:10.1111/j.2042-3292.2012.00416.x                                     | Case report                  | Australia     | 1  | UG    | Treatment            | Standing |   | X |

|                                                                                                                                                                                                                                                                                       |                            |               |    |       |              |          |   |   |
|---------------------------------------------------------------------------------------------------------------------------------------------------------------------------------------------------------------------------------------------------------------------------------------|----------------------------|---------------|----|-------|--------------|----------|---|---|
| 257. Hoogmoed LMv, Galuppo LD. Laparoscopic ovariectomy using the Endo-GIA stapling device and Endo-Catch pouches and evaluation of analgesic efficacy of epidural morphine sulfate in 10 mares. <i>Veterinary Surgery</i> . 2005;34(6):646-650. doi:10.1111/j.1532-950X.2005.00100.x | Randomized clinical trial  | North America | 10 | UG    | Experimental | Standing | x |   |
| 258. Hubert JD, Burba DJ, Moore RM. Evaluation of a vessel-sealing device for laparoscopic granulosa cell tumor removal in standing mares. <i>Vet Surg</i> . Jun 2006;35(4):324-9. doi:10.1111/j.1532-950X.2006.00151.x                                                               | Retrospective case series  | North America | 8  | UG    | Treatment    | Standing | x | X |
| 259. Jones ARE, Ragle CA, Anderson D, Scott C. Laparoscopic evaluation of the small intestine in the standing horse: Technique and effects*. Article. <i>Veterinary Surgery</i> . 2017;46(6):812-820. doi:10.1111/vsu.12664                                                           | Prospective pilot study    | North America | 5  | GI    | Experimental | Standing | x |   |
| 260. Jones ARE, Ragle CA, Huggons NA, Tibary AA. Bilateral ovariectomy as a treatment for chronic pyometra in four horses. <i>Equine Veterinary Education</i> . Oct 2020;32(10):E189-E193. doi:10.1111/eve.13167                                                                      | Case series                | North America | 4  | UG    | Treatment    | Standing |   |   |
| 261. Kadic DTN, Bonilla AG. A two-step ovariohysterectomy with unilateral left flank laparoscopic assistance in a Quarter Horse mare. <i>Equine Veterinary Education</i> . Oct 2020;32(10):E199-E202. doi:10.1111/eve.13131                                                           | Case report                | North America | 1  | UG    | Treatment    | Standing | x |   |
| 262. Kambayashi Y, Tsuzuki N, Seo J, et al. Evaluation of single-incision laparoscopic ovariectomy in standing mares. <i>Journal of Equine Veterinary Science</i> . 2014;34(3):446-450. doi:10.1016/j.jevs.2013.07.006                                                                | Case series                | Asia          | 5  | UG    | Treatment    | Standing | x | X |
| 263. Kamus L.P. Ruzickova,P. Piat,P. Trencart,A. BonillaUse of barbed suture for thoracoscopic repair of diaphragmatic hernias: Three cases. <i>Equine Vet edu</i> . 2022                                                                                                             | Case series                | Europe        | 4  | Other | Treatment    | Standing |   | X |
| 264. Keoughan CG, Rodgerson DH, Brown MP. Hand-assisted laparoscopic left nephrectomy in standing horses. <i>Vet Surg</i> . May-Jun 2003;32(3):206-12. doi:10.1053/jvet.2003.50028                                                                                                    | Prospective clinical study | North America | 8  | UG    | Treatment    | Standing |   |   |

|                                                                                                                                                                                                                                                                                                                     |                            |               |    |    |              |            |   |   |
|---------------------------------------------------------------------------------------------------------------------------------------------------------------------------------------------------------------------------------------------------------------------------------------------------------------------|----------------------------|---------------|----|----|--------------|------------|---|---|
| 265. Klohnen A, Wilson DG. Laparoscopic repair of scrotal hernia in two foals. <i>Vet Surg.</i> Sep-Oct 1996;25(5):414-16. doi:10.1111/j.1532-950x.1996.tb01437.x                                                                                                                                                   | Case report                | North America | 2  | GI | Treatment    | Recumbency | x |   |
| 266. Koch DW, Easley JT, Hatzel JN, et al. Prospective randomized investigation of topical anesthesia during unilateral laparoscopic ovariectomy in horses. <i>Vet Surg.</i> Jun 2020;49 Suppl 1:O54-o59. doi:10.1111/vsu.13264                                                                                     | Randomized clinical trial  | North America | 15 | UG | Experimental | Standing   | x |   |
| 267. Köllmann M, Rötting A, Heberling A, Sieme H. Laparoscopic techniques for investigating the equine oviduct. <i>Equine Vet J.</i> Jan 2011;43(1):106-11. doi:10.1111/j.2042-3306.2010.00143.x                                                                                                                    | Prospective clinical study | Europe        | 10 | UG | Experimental | Standing   | x |   |
| 268. Kummer M, Theiss F, Jackson M, Fürst A. Evaluation of a Motorized Morcellator for Laparoscopic Removal of Granulosa-Theca Cell Tumors in Standing Mares. Article. <i>Veterinary Surgery.</i> 2010;39(5):649-653. doi:10.1111/j.1532-950X.2010.00688.x                                                          | Case series                | Europe        | 7  | UG | Treatment    | Standing   | x |   |
| 269. Lacitignola L, Imperante A, De Siena R, et al. Wound Retractor Laparoscopic Port System for Standing Laparoscopic Cryptorchidectomy in the Horse: A Case Report. <i>Journal of Equine Veterinary Science.</i> Sep 2020;92103168. doi:10.1016/j.jevs.2020.103168                                                | Case report                | Europe        | 1  | UG | Treatment    | Standing   | x |   |
| 270. Lawless SP, Moorman VJ, Hendrickson DA, Mama KR. Comparison of sedation quality and safety of detomidine and romifidine as a continuous rate infusion for standing elective laparoscopic ovariectomy in mares. <i>Vet Surg.</i> Jul 2021;50(5):990-998. doi:10.1111/vsu.13627                                  | Prospective clinical study | North America | 18 | UG | Experimental | Standing   |   | X |
| 271. Lloyd D, Walmsley JP, Greet TRC, Payne RJ, Newton JR, Phillips TJ. Electrosurgery as the sole means of haemostasis during the laparoscopic removal of pathologically enlarged ovaries in mares: a report of 55 cases. <i>Equine Veterinary Journal.</i> May 2007;39(3):210-214. doi:10.2746/042516407x17116522 | Case series                | Europe        | 55 | UG | Treatment    | Standing   |   |   |
| 272. Lund CM, Ragle CA, Dylan Lutter J, Farnsworth KD. Use of a motorized morcellator for elective bilateral laparoscopic ovariectomy in standing equids: 30 cases (2007-2013). Article. <i>Journal of the American Veterinary Medical Association.</i> 2014;244(10):1191-1197. doi:10.2460/javma.244.10.1191       | Retrospective case series  | North America | 30 | UG | Treatment    | Standing   |   |   |

|                                                                                                                                                                                            |             |               |   |    |           |          |   |   |
|--------------------------------------------------------------------------------------------------------------------------------------------------------------------------------------------|-------------|---------------|---|----|-----------|----------|---|---|
| 273. Lund CM, Ragle CA, Lutter JD. Laparoscopic removal of a bladder urolith in a standing horse. <i>J Am Vet Med Assoc</i> . Nov 1 2013;243(9):1323-8. doi:10.2460/javma.243.9.1323       | Case report | North America | 1 | UG | Treatment | Standing |   | X |
| 274. Mariën T. Standing laparoscopic herniorrhaphy in stallions using cylindrical polypropylene mesh prosthesis. <i>Equine Vet J</i> . Jan 2001;33(1):91-6. doi:10.2746/042516401776767476 | Case series | Europe        | 9 | GI | Treatment | Standing | x |   |
