# Supplementary material for: Occurrence and Definitions of Intra and Postoperative Complications Related to Laparoscopy in Equids: A Scoping Review
Source: MDPI journal article supplement (doi:10.3390/vetsci9100577), 2022-10-17
Supplement: s1 [file s1]

## **Search strategy**

**Web of Science:** (((ALL=(horse OR equine OR mule OR donkey)) AND ALL=(laparoscopy OR laparoscopies)) AND LA=(English)) AND PY=(1982-2022)

**PubMed:** (((horse OR equine OR mule OR donkey) AND (laparoscopy OR laparoscopies)) AND (English[Language])) AND (("1982/01/01"[Date - Completion] : "2022/12/31"[Date - Completion]))

**CAB:** (horse OR equine OR mule OR donkey) AND (laparoscopy OR laparoscopies) AND la:(English) AND yr:[1982 TO 2022]

**Scopus:** ( horse OR equine OR mule OR donkey ) AND ( laparoscopy OR laparoscopies ) AND ( LIMIT-TO ( LANGUAGE , "English" ) ) AND ( EXCLUDE ( PUBYEAR , 1981 ) OR EXCLUDE ( PUBYEAR , 1979 ) OR EXCLUDE ( PUBYEAR , 1978 ) OR EXCLUDE ( PUBYEAR , 1977 ) OR EXCLUDE ( PUBYEAR , 1974 ) OR EXCLUDE ( PUBYEAR , 1972 ) OR EXCLUDE ( PUBYEAR , 1970 ) )
